# Supplementary material
Source: publisher figshare collection journal article supplement (https://gsajournals.figshare.com/ndownloader/files/23936402)
Supplement: Supplementary file 1 [file 23936402]

ID	village	species	a_cyto	a_amp	a_oa	j_cyto	j_amp	j_oa	b_cyto	b_amp	b_oa	c_cyto	c_col_amp	c_col_oa	c_cyto	c_gam_amp	c_gam_oa	d_cyto	d_amp	d_oa	u_cyto	u_amp	u_oa
BF0600306	Koakin	M	1	1	1	0	0	0	0	0	0	0	0	0	0	0	0	0	0	0	0	0	0
BF0600930	Kombissiri	M	2	1	1	0	0	0	0	0	0	0	0	0	0	0	0	0	0	0	2	2	2
BF0601776	Loussa	M	2	1	1	0	0	0	0	0	0	0	0	0	0	0	0	1	0	0	0	0	0
BF0605000	Namymi	M	2	1	1	0	0	0	0	0	0	0	0	0	0	0	0	0	0	0	1	1	1
BF0600708	Siguivousse	M	2	2	2	0	0	0	0	0	0	0	0	0	0	0	0	0	0	0	0	1	1
BF0600537	Wemtenga	M	2	2	2	0	0	0	0	0	0	0	0	0	0	0	0	0	0	0	0	0	0
BF0600910	Kombissiri	M	2	2	2	0	0	0	0	0	0	0	0	0	0	0	0	0	0	0	0	0	0
BF0600540	Wemtenga	M	2	2	2	0	0	0	0	0	0	0	0	0	0	0	0	0	0	0	0	0	0
BF0600926	Kombissiri	M	2	2	2	0	0	0	0	0	0	0	0	0	0	0	0	0	0	0	1	1	1
BF0600498	Wemtenga	M	2	2	2	0	0	0	0	0	0	0	0	0	0	0	0	0	0	0	0	0	0
BF0600736	Siguivousse	M	2	2	2	0	0	0	0	0	0	0	0	0	0	0	0	1	0	0	0	0	0
BF0600559	Kambo	M	2	2	2	0	0	0	0	0	0	0	0	0	0	0	0	0	0	0	0	0	0
BF0600807	Yargo	M	2	2	2	0	0	0	0	0	0	0	0	0	0	0	0	0	0	0	1	1	1
BF0600898	Kombissiri	M	2	2	2	0	0	0	0	0	0	0	0	0	0	0	0	0	0	0	0	0	0
BF0600806	Yargo	M	2	2	2	0	0	0	0	0	0	0	0	0	0	0	0	0	0	0	1	1	1
BF0601836	Niango	M	2	2	2	0	0	0	0	0	0	0	0	0	0	0	0	0	0	0	0	0	0
BF0601842	Niango	M	2	2	2	0	0	0	0	0	0	0	0	0	0	0	0	0	0	0	0	0	0
BF0602216	Passebtinga	M	2	2	2	0	0	0	0	0	0	0	0	0	0	0	0	0	0	0	0	1	1
BF0601843	Niango	M	2	2	2	0	0	0	0	0	0	0	0	0	0	0	0	0	0	0	0	0	0
BF0601922	Bilbalogo	M	2	2	2	0	0	0	0	0	0	0	0	0	0	0	0	0	0	0	0	0	0
BF0602154	Ganwoko	M	2	2	2	0	0	0	0	0	0	0	0	0	0	0	0	0	0	0	0	0	0
BF0602340	Sarogo	M	2	2	2	0	0	0	0	0	0	0	0	0	0	0	0	0	0	0	0	0	0
BF0601827	Niango	M	2	2	2	0	0	0	0	0	0	0	0	0	0	0	0	0	0	0	1	1	1
BF0601870	Bilbalogo	M	2	2	2	0	0	0	0	0	0	0	0	0	0	0	0	0	0	0	1	1	1
BF0602188	Ganwoko	M	2	2	2	0	0	0	0	0	0	0	0	0	0	0	0	0	0	0	0	0	0
BF0602000	Poedogo	M	2	2	2	0	0	0	0	0	0	0	0	0	0	0	0	0	0	0	0	2	2
BF0601962	Poedogo	M	2	2	2	0	0	0	0	0	0	0	0	0	0	0	0	0	0	0	0	0	0
BF0604137	Nacombogo	M	2	2	2	0	0	0	0	0	0	0	0	0	0	0	0	0	0	0	0	0	0
BF0604301	Binstigre	M	2	2	2	0	0	0	0	0	0	0	0	0	0	0	0	0	0	0	1	1	1
BF0604084	Gonse	M	2	2	2	0	0	0	0	0	0	0	0	0	0	0	0	0	0	0	0	0	0
BF0604146	Nacombogo	M	2	2	2	0	0	0	0	0	0	0	0	0	0	0	0	0	0	0	0	1	1
BF0604311	Binstigre	M	2	2	2	0	0	0	0	0	0	0	0	0	0	0	0	0	0	0	0	0	0
BF0604170	Sidtenga	M	2	2	2	0	0	0	0	0	0	0	0	0	0	0	0	0	0	0	1	1	1
BF0604606	Zarahougo	M	2	2	2	0	0	0	0	0	0	0	0	0	0	0	0	1	0	0	0	1	1
BF0604426	Kongbaga	M	2	2	2	0	0	0	0	0	0	0	0	0	0	0	0	0	0	0	0	0	0
BF0604876	Manga	M	2	2	2	0	0	0	0	0	0	0	0	0	0	0	0	0	0	0	0	1	1
BF0604270	Binstigre	M	2	2	2	0	0	0	0	0	0	0	0	0	0	0	0	0	0	0	2	2	2
BF0604127	Nacombogo	M	2	2	2	0	0	0	0	0	0	0	0	0	0	0	0	0	0	0	0	0	0
BF0604002	Boulare	M	2	2	2	0	0	0	0	0	0	0	0	0	0	0	0	0	0	0	0	0	0
BF0603626	Tamse	M	2	2	2	0	0	0	0	0	0	0	0	0	0	0	0	0	0	0	0	0	0
BF0603588	Goubla	M	2	2	2	0	0	0	0	0	0	0	0	0	0	0	0	0	0	0	0	1	1
BF0603940	Kalwiga	M	2	2	2	0	0	0	0	0	0	0	0	0	0	0	0	0	0	0	0	1	1
BF0604062	Gonse	M	2	2	2	0	0	0	0	0	0	0	0	0	0	0	0	1	0	0	0	0	0
BF0601561	Bangleongo	M	2	2	2	0	0	0	0	0	0	0	0	0	0	0	0	0	0	0	1	1	1
BF0601755	Loussa	M	2	2	2	0	0	0	0	0	0	0	0	0	0	0	0	0	0	0	1	1	1
BF0601573	Tuili	M	2	2	2	0	0	0	0	0	0	0	0	0	0	0	0	0	0	0	0	0	0
BF0601662	Godin	M	2	2	2	0	0	0	0	0	0	0	0	0	0	0	0	0	0	0	0	2	2
BF0601452	Koassa	M	2	2	2	0	0	0	0	0	0	0	0	0	0	0	0	0	0	0	1	1	1
BF0601424	Soula	M	2	2	2	0	0	0	0	0	0	0	0	0	0	0	0	0	0	0	2	2	2
BF0601732	Ipelce	M	2	2	2	0	0	0	0	0	0	0	0	0	0	0	0	0	0	0	1	1	1
BF0602468	Goudri	M	2	2	2	0	0	0	0	0	0	0	0	0	0	0	0	0	0	0	0	0	0
BF0602837	Togse	M	2	2	2	0	0	0	0	0	0	0	0	0	0	0	0	0	0	0	2	2	2
BF0602483	Goudri	M	2	2	2	0	0	0	0	0	0	0	0	0	0	0	0	0	0	0	1	1	1
BF0602658	Niongho	M	2	2	2	0	0	0	0	0	0	0	0	0	0	0	0	0	0	0	1	1	1
BF0602662	Niongho	M	2	2	2	0	0	0	0	0	0	0	0	0	0	0	0	0	0	0	0	0	0
BF0602487	Goudri	M	2	2	2	0	0	0	0	0	0	0	0	0	0	0	0	0	0	0	1	1	1
BF0602721	Dapeleogo	M	2	2	2	0	0	0	0	0	0	0	0	0	0	0	0	0	0	0	0	0	0
BF0602810	Togse	M	2	2	2	0	0	0	0	0	0	0	0	0	0	0	0	0	0	0	0	0	0
BF0602750	Ragamsin	M	2	2	2	0	0	0	0	0	0	0	0	0	0	0	0	0	0	0	0	2	2
BF0601040	Lamzondo	M	2	2	2	0	0	0	0	0	0	0	0	0	0	0	0	0	0	0	0	0	0
BF0600996	Lamzondo	M	2	2	2	0	0	0	0	0	0	0	0	0	0	0	0	0	0	0	1	1	1
BF0601104	Gonce	M	2	2	2	0	0	0	0	0	0	0	0	0	0	0	0	1	0	0	0	1	1
BF0601251	Sabraogo	M	2	2	2	0	0	0	0	0	0	0	0	0	0	0	0	0	0	0	0	0	0
BF0601044	Lamzondo	M	2	2	2	0	0	0	0	0	0	0	0	0	0	0	0	0	0	0	0	2	2
BF0601030	Lamzondo	M	2	2	2	0	0	0	0	0	0	0	0	0	0	0	0	0	0	0	0	1	1
BF0601058	Gonce	M	2	2	2	0	0	0	0	0	0	0	0	0	0	0	0	0	0	0	0	1	1
BF0601156	Kierma	M	2	2	2	0	0	0	0	0	0	0	0	0	0	0	0	0	0	0	0	0	0
BF0601032	Lamzondo	M	2	2	2	0	0	0	0	0	0	0	0	0	0	0	0	0	0	0	1	1	1
BF0601134	Gonce	M	2	2	2	0	0	0	0	0	0	0	0	0	0	0	0	0	0	0	0	1	1
BF0601196	Kierma	M	2	2	2	0	0	0	0	0	0	0	0	0	0	0	0	0	0	0	0	0	0
BF0601038	Lamzondo	M	2	2	2	0	0	0	0	0	0	0	0	0	0	0	0	0	0	0	1	1	0
BF0601093	Gonce	M	2	2	2	0	0	0	0	0	0	0	0	0	0	0	0	0	0	0	1	1	1
BF0601167	Kierma	M	2	2	2	0	0	0	0	0	0	0	0	0	0	0	0	0	0	0	0	0	0
BF0600162	Toundou	M	2	2	2	0	0	0	0	0	0	0	0	0	0	0	0	0	0	0	1	1	1
BF0600434	Masgo	M	2	2	2	0	0	0	0	0	0	0	0	0	0	0	0	0	0	0	1	1	1
BF0600312	Koakin	M	2	2	2	0	0	0	0	0	0	0	0	0	0	0	0	0	0	0	1	1	1
BF0600338	Koakin	M	2	2	2	0	0	0	0	0	0	0	0	0	0	0	0	0	0	0	1	1	1
BF0600403	Masgo	M	2	2	2	0	0	0	0	0	0	0	0	0	0	0	0	0	0	0	0	0	0
BF0600280	Koakin	M	2	2	2	0	0	0	0	0	0	0	0	0	0	0	0	0	0	0	2	2	2
BF0600410	Masgo	M	2	2	2	0	0	0	0	0	0	0	0	0	0	0	0	0	0	0	0	0	0
BF0600148	Gana	M	2	2	2	0	0	0	0	0	0	0	0	0	0	0	0	0	0	0	0	0	0
BF0600112	Gana	M	2	2	2	0	0	0	0	0	0	0	0	0	0	0	0	0	0	0	0	1	1
BF0600286	Seloghin	M	2	2	2	0	0	0	0	0	0	0	0	0	0	0	0	0	0	0	1	0	0
BF0600464	Wemtenga	M	2	2	2	0	0	0	0	0	0	0	0	0	0	0	0	0	0	0	0	0	0
BF0600476	Wemtenga	M	2	2	2	0	0	0	0	0	0	0	0	0	0	0	0	0	0	0	0	0	0
BF0603128	Ragadogo	M	2	2	2	0	0	0	0	0	0	0	0	0	0	0	0	0	0	0	1	1	0
BF0603208	Wilga	M	2	2	2	0	0	0	0	0	0	0	0	0	0	0	0	0	0	0	0	1	1
BF0603304	Bana	M	2	2	2	0	0	0	0	0	0	0	0	0	0	0	0	0	0	0	1	1	1
BF0603360	Souli	M	2	2	2	0	0	0	0	0	0	0	0	0	0	0	0	0	0	0	0	0	0
BF0603430	ToeBanega	M	2	2	2	0	0	0	0	0	0	0	0	0	0	0	0	1	0	0	0	0	0
BF0603337	Bana	M	2	2	2	0	0	0	0	0	0	0	0	0	0	0	0	0	0	0	0	0	0
BF0603316	Bana	M	2	2	2	0	0	0	0	0	0	0	0	0	0	0	0	0	0	0	0	0	0
BF0603358	Souli	M	2	2	2	0	0	0	0	0	0	0	0	0	0	0	0	0	0	0	2	2	2
BF0605131	Nanoro	M	2	2	2	0	0	0	0	0	0	0	0	0	0	0	0	0	0	0	2	2	2
BF0605098	Poessi	M	2	2	2	0	0	0	0	0	0	0	0	0	0	0	0	0	0	0	1	1	1
BF0605146	Nanoro	M	2	2	2	0	0	0	0	0	0	0	0	0	0	0	0	0	0	0	0	0	0
BF0605118	Nanoro	M	2	2	2	0	0	0	0	0	0	0	0	0	0	0	0	0	0	0	0	1	1
BF0605276	Latanga	M	2	2	2	0	0	0	0	0	0	0	0	0	0	0	0	0	0	0	0	1	1
BF0605120	Nanoro	M	2	2	2	0	0	0	0	0	0	0	0	0	0	0	0	0	0	0	2	2	2
BF0605169	Ilyale	M	2	2	2	0	0	0	0	0	0	0	0	0	0	0	0	0	0	0	0	0	0
BF0605170	Ilyale	M	2	2	2	0	0	0	0	0	0	0	0	0	0	0	0	0	0	0	0	0	0
BF0605514	Seguedin	M	2	2	2	0	0	0	0	0	0	0	0	0	0	0	0	0	0	0	0	0	0
BF0605545	Nazoanga	M	2	2	2	0	0	0	0	0	0	0	0	0	0	0	0	0	0	0	1	1	1
BF0605470	Seguedin	M	2	2	2	0	0	0	0	0	0	0	0	0	0	0	0	0	0	0	0	0	0
BF0605546	Nazoanga	M	2	2	2	0	0	0	0	0	0	0	0	0	0	0	0	0	0	0	0	0	0
BF0605384	Kourono	M	2	2	2	0	0	0	0	0	0	0	0	0	0	0	0	0	0	0	0	0	0
BF0605647	Kona	M	2	2	2	0	0	0	0	0	0	0	0	0	0	0	0	1	0	0	1	1	1
BF0600135	Gana	M	2	2	2	0	0	0	0	1	1	0	1	1	0	0	0	1	0	0	0	0	0
BF0600136	Gana	M	2	2	2	0	0	0	1	0	0	1	0	0	1	0	0	0	0	0	0	1	1
BF0604282	Binstigre	M	2	1	1	0	0	0	1	1	0	1	1	1	1	0	0	0	0	0	0	0	0
BF0600699	Siguivousse	M	2	2	2	0	0	0	1	1	0	1	1	1	1	0	0	0	0	0	0	0	0
BF0602247	Passebtinga	M	2	2	2	0	0	0	1	1	0	1	1	1	1	0	1	0	0	0	1	1	2
BF0604486	Zagable	M	2	2	2	0	0	0	1	1	0	1	1	1	1	0	0	0	0	0	0	0	0
BF0603803	Nangouman	M	2	2	2	0	0	0	1	1	0	1	1	1	1	0	0	1	0	0	0	0	0
BF0603524	Tibe	M	2	2	2	0	0	0	1	1	0	0	0	0	0	0	0	1	0	0	0	0	0
BF0603805	Nangouman	M	2	2	2	0	0	0	1	1	0	1	1	1	1	0	0	0	0	0	0	0	0
BF0603750	Boura-Toemissin	M	2	2	2	0	0	0	1	1	0	0	1	1	0	0	0	0	0	0	0	1	1
BF0601526	Bangleongo	M	2	2	2	0	0	0	1	1	0	0	0	0	0	0	0	0	0	0	1	1	1
BF0601498	Bangleongo	M	2	2	2	0	0	0	1	1	0	1	1	1	1	0	0	0	0	0	1	0	0
BF0601524	Bangleongo	M	2	2	2	0	0	0	1	1	0	1	1	1	1	0	0	0	0	0	0	0	0
BF0601752	Loussa	M	2	2	2	0	0	0	1	1	0	0	0	0	0	0	0	0	0	0	0	0	0
BF0602506	Goudri	M	2	2	2	0	0	0	1	1	0	0	0	0	0	0	0	0	0	0	0	0	0
BF0602762	Ragamsin	M	2	2	2	0	0	0	1	1	0	1	1	1	1	0	1	1	0	0	0	0	0
BF0602872	KaioboCentre	M	2	2	2	0	0	0	1	1	0	1	1	1	1	0	0	0	0	0	0	0	0
BF0602664	Niongho	M	2	2	2	0	0	0	1	1	0	1	1	1	1	0	0	0	0	0	0	0	0
BF0602906	Teyoko	M	2	2	2	0	0	0	1	1	0	1	1	0	1	0	1	0	0	0	0	0	0
BF0601175	Kierma	M	2	2	2	0	0	0	1	1	0	1	1	1	1	0	0	0	0	0	1	1	1
BF0601162	Kierma	M	2	2	2	0	0	0	1	1	0	0	0	0	0	0	0	0	0	0	0	0	0
BF0600984	Lamzondo	M	2	2	2	0	0	0	1	1	0	1	1	1	1	0	0	0	0	0	0	0	0
BF0600090	Pibse	M	2	2	2	0	0	0	1	1	0	1	1	1	1	0	0	0	0	0	0	0	0
BF0600130	Gana	M	2	2	2	0	0	0	1	1	0	1	1	1	1	0	0	0	0	0	1	1	0
BF0600343	Koakin	M	2	2	2	0	0	0	1	1	0	1	1	1	1	0	0	0	0	0	1	1	1
BF0603004	Zaptinga	M	2	2	2	0	0	0	1	1	0	1	1	1	1	0	0	0	0	0	1	1	1
BF0603026	Zaptinga	M	2	2	2	0	0	0	1	1	0	0	0	0	0	0	0	0	0	0	0	0	0
BF0605596	Zimidin	M	2	2	2	0	0	0	1	1	0	1	1	1	1	0	0	1	0	0	0	0	0
BF0605474	Seguedin	M	2	2	2	0	0	0	1	1	0	1	1	1	1	0	0	0	0	0	0	1	0
BF0600757	Binsboubou	M	1	1	1	0	0	0	1	1	1	0	0	0	0	0	0	0	0	0	0	0	0
BF0600521	Wemtenga	M	1	1	1	0	0	0	1	1	1	1	1	1	1	0	0	0	0	0	0	0	0
BF0603823	Nangouman	M	1	1	1	0	0	0	1	1	1	1	1	1	1	0	0	0	0	0	0	0	0
BF0602411	Boura-Yakin	M	1	1	1	0	0	0	1	1	1	1	1	1	1	0	0	0	0	0	0	0	0
BF0601138	Gonce	M	1	1	1	0	0	0	1	1	1	1	1	1	1	0	0	0	0	0	0	0	0
BF0600213	Guidgretinga	M	1	1	1	0	0	0	1	1	1	1	1	1	1	0	0	1	0	0	0	0	0
BF0600291	Seloghin	M	1	1	1	0	0	0	1	1	1	1	1	1	1	0	1	0	0	0	0	0	0
BF0602120	Sakouissi	M	2	0	0	0	0	0	1	1	1	0	0	0	0	0	0	0	0	0	0	0	0
BF0604040	Boulare	M	2	1	1	0	0	0	1	1	1	0	0	0	0	0	0	0	0	0	0	2	2
BF0603744	Boura-Toemissin	M	2	1	1	0	0	0	1	1	1	1	1	1	1	0	1	0	0	0	1	1	1
BF0601502	Bangleongo	M	2	1	1	0	0	0	1	1	1	1	1	1	1	0	1	0	0	0	1	1	1
BF0601556	Tuili	M	2	1	1	0	0	0	1	1	1	0	0	0	0	0	0	0	0	0	1	1	1
BF0602434	Boura-Yakin	M	2	1	1	0	0	0	1	1	1	0	0	0	0	0	0	0	0	0	0	0	0
BF0601372	Soula	M	2	1	1	0	0	0	1	1	1	1	1	1	1	0	0	0	0	0	0	0	0
BF0600380	Masgo	M	2	1	1	0	0	0	1	1	1	1	1	1	1	0	0	0	0	0	0	0	0
BF0605598	Zimidin	M	2	1	1	0	0	0	1	1	1	1	1	1	1	0	0	1	0	0	0	0	0
BF0605510	Seguedin	M	2	1	1	0	0	0	1	1	1	1	1	1	1	0	0	0	0	0	0	1	1
BF0600649	Bion	M	2	2	2	0	0	0	1	1	1	0	0	0	0	0	0	0	0	0	0	0	0
BF0600484	Wemtenga	M	2	2	2	0	0	0	1	1	1	1	1	1	1	0	0	0	0	0	0	0	0
BF0600492	Wemtenga	M	2	2	2	0	0	0	1	1	1	1	1	1	1	0	0	0	0	0	0	0	0
BF0600529	Wemtenga	M	2	2	2	0	0	0	1	1	1	1	1	1	1	0	1	0	0	0	0	0	0
BF0600604	Nobili	M	2	2	2	0	0	0	1	1	1	1	1	1	1	0	0	0	0	0	0	0	0
BF0600552	Kambo	M	2	2	2	0	0	0	1	1	1	1	1	1	1	0	0	0	0	0	0	0	0
BF0600516	Wemtenga	M	2	2	2	0	0	0	1	1	1	1	1	1	1	0	0	0	0	0	0	0	0
BF0600518	Wemtenga	M	2	2	2	0	0	0	1	1	1	1	1	1	1	0	0	1	0	0	0	0	0
BF0600935	Kombissiri	M	2	2	2	0	0	0	1	1	1	1	1	0	1	0	0	0	0	0	0	0	0
BF0600520	Wemtenga	M	2	2	2	0	0	0	1	1	1	1	1	1	1	0	1	0	0	0	0	0	0
BF0600803	Yargo	M	2	2	2	0	0	0	1	1	1	1	1	1	1	0	0	0	0	0	0	0	0
BF0600522	Wemtenga	M	2	2	2	0	0	0	1	1	1	1	1	1	1	0	1	0	0	0	0	0	0
BF0600646	Bion	M	2	2	2	0	0	0	1	1	1	1	1	1	1	0	0	0	0	0	0	0	0
BF0600809	Yargo	M	2	2	2	0	0	0	1	1	1	0	0	0	0	0	0	0	0	0	1	1	1
BF0600903	Kombissiri	M	2	2	2	0	0	0	1	1	1	1	1	1	1	0	0	0	0	0	1	1	1
BF0600956	Kombissiri	M	2	2	2	0	0	0	1	1	1	1	1	1	1	0	1	0	0	0	0	0	0
BF0602026	Kossala	M	2	2	2	0	0	0	1	1	1	1	1	1	1	0	0	0	0	0	0	0	0
BF0602106	Sakouissi	M	2	2	2	0	0	0	1	1	1	0	0	0	0	0	0	0	0	0	0	0	0
BF0602110	Sakouissi	M	2	2	2	0	0	0	1	1	1	1	0	0	1	1	1	1	1	1	0	0	0
BF0602218	Passebtinga	M	2	2	2	0	0	0	1	1	1	1	1	1	1	0	1	0	0	0	1	1	1
BF0601844	Niango	M	2	2	2	0	0	0	1	1	1	1	1	1	1	0	0	0	0	0	0	0	0
BF0601980	Poedogo	M	2	2	2	0	0	0	1	1	1	1	1	1	1	0	1	0	0	0	1	1	1
BF0602122	Sakouissi	M	2	2	2	0	0	0	1	1	1	1	1	1	1	0	1	0	0	0	0	0	0
BF0601934	Bilbalogo	M	2	2	2	0	0	0	1	1	1	1	1	1	1	0	0	0	0	0	0	1	1
BF0602244	Passebtinga	M	2	2	2	0	0	0	1	1	1	1	1	1	1	0	0	0	0	0	0	0	0
BF0602342	Sarogo	M	2	2	2	0	0	0	1	1	1	1	1	1	1	0	1	0	0	0	0	0	0
BF0601988	Poedogo	M	2	2	2	0	0	0	1	1	1	1	1	1	1	0	0	0	0	0	0	0	0
BF0601826	Niango	M	2	2	2	0	0	0	1	1	1	1	1	1	1	0	0	0	0	0	0	0	0
BF0602250	Passebtinga	M	2	2	2	0	0	0	1	1	1	1	1	1	1	0	0	0	0	0	1	1	1
BF0602254	Passebtinga	M	2	2	2	0	0	0	1	1	1	1	1	1	1	0	1	0	0	0	0	0	0
BF0600342	Koakin	M	2	2	2	0	0	0	1	1	1	1	1	1	1	0	0	0	0	0	0	0	0
BF0604307	Binstigre	M	2	2	2	0	0	0	1	1	1	0	0	0	0	0	0	0	0	0	0	0	0
BF0604089	Gonse	M	2	2	2	0	0	0	1	1	1	1	1	1	1	0	0	0	0	0	0	0	0
BF0604310	Binstigre	M	2	2	2	0	0	0	1	1	1	0	1	1	0	0	0	0	0	0	1	1	1
BF0604373	Doncin	M	2	2	2	0	0	0	1	1	1	1	1	1	1	0	0	0	0	0	0	0	0
BF0604661	Doara	M	2	2	2	0	0	0	1	1	1	1	1	1	1	0	0	0	0	0	1	1	0
BF0604148	Nacombogo	M	2	2	2	0	0	0	1	1	1	1	1	1	1	0	0	1	0	0	0	0	0
BF0604860	Manga	M	2	2	2	0	0	0	1	1	1	1	0	0	1	0	0	0	0	0	1	1	1
BF0604168	Sidtenga	M	2	2	2	0	0	0	1	1	1	0	0	0	0	0	0	0	0	0	1	1	0
BF0604330	Kongrissince	M	2	2	2	0	0	0	1	1	1	1	1	1	1	0	0	1	0	0	0	0	0
BF0604741	Tampuy	M	2	2	2	0	0	0	1	1	1	1	1	1	1	0	0	0	0	0	0	0	0
BF0604333	Kongrissince	M	2	2	2	0	0	0	1	1	1	1	1	1	1	0	0	0	0	0	0	0	0
BF0604612	Zarahougo	M	2	2	2	0	0	0	1	1	1	1	1	1	1	0	1	0	0	0	0	0	0
BF0604618	Zarahougo	M	2	2	2	0	0	0	1	1	1	1	1	1	1	0	0	0	0	0	0	0	0
BF0604188	Sidtenga	M	2	2	2	0	0	0	1	1	1	1	1	1	1	0	0	1	0	0	0	0	0
BF0604278	Binstigre	M	2	2	2	0	0	0	1	1	1	1	1	1	1	0	1	0	0	0	0	0	0
BF0604340	Kongrissince	M	2	2	2	0	0	0	1	1	1	0	0	0	0	0	0	0	0	0	0	0	0
BF0604748	Tampuy	M	2	2	2	0	0	0	1	1	1	1	1	1	1	0	0	0	0	0	0	0	0
BF0603688	Guere	M	2	2	2	0	0	0	1	1	1	1	1	1	1	0	0	0	0	0	0	0	0
BF0603825	Nangouman	M	2	2	2	0	0	0	1	1	1	1	1	1	1	0	0	0	0	0	0	0	0
BF0603504	Tibe	M	2	2	2	0	0	0	1	1	1	0	0	0	0	0	0	0	0	0	0	0	0
BF0603586	Goubla	M	2	2	2	0	0	0	1	1	1	1	1	1	1	0	0	0	0	0	0	0	0
BF0603832	Nangouman	M	2	2	2	0	0	0	1	1	1	1	1	1	1	0	0	0	0	0	0	0	0
BF0603908	Kalwiga	M	2	2	2	0	0	0	1	1	1	1	1	1	1	0	0	0	0	0	0	0	0
BF0603842	Nangouman	M	2	2	2	0	0	0	1	1	1	1	1	1	1	0	0	0	0	0	1	1	1
BF0603636	Tamse	M	2	2	2	0	0	0	1	1	1	0	0	1	0	0	0	0	0	0	0	0	0
BF0603846	Nangouman	M	2	2	2	0	0	0	1	1	1	1	0	1	1	0	0	0	0	0	0	0	0
BF0603522	Tibe	M	2	2	2	0	0	0	1	1	1	1	1	1	1	0	0	0	0	0	1	1	1
BF0603594	Goubla	M	2	2	2	0	0	0	1	1	1	1	1	1	1	0	0	0	0	0	1	1	1
BF0603714	Boura-Toemissin	M	2	2	2	0	0	0	1	1	1	1	1	1	1	0	0	0	0	0	0	0	0
BF0603848	Nangouman	M	2	2	2	0	0	0	1	1	1	1	1	1	1	0	0	0	0	0	0	0	0
BF0603930	Kalwiga	M	2	2	2	0	0	0	1	1	1	1	1	1	1	0	0	1	0	0	0	0	0
BF0604042	Boulare	M	2	2	2	0	0	0	1	1	1	1	1	1	1	0	0	0	0	0	0	0	0
BF0603720	Boura-Toemissin	M	2	2	2	0	0	0	1	1	1	1	1	1	1	0	1	0	0	0	1	1	0
BF0604052	Gonse	M	2	2	2	0	0	0	1	1	1	1	1	0	1	0	0	0	0	0	0	0	0
BF0603597	Goubla	M	2	2	2	0	0	0	1	1	1	1	1	1	1	0	1	0	0	0	0	0	0
BF0603861	BonGoumBarga	M	2	2	2	0	0	0	1	1	1	0	0	0	0	0	0	0	0	0	1	1	1
BF0603730	Boura-Toemissin	M	2	2	2	0	0	0	1	1	1	0	0	0	0	0	0	0	0	0	0	0	0
BF0603543	Tibe	M	2	2	2	0	0	0	1	1	1	1	1	1	1	0	0	0	0	0	0	0	0
BF0603547	Tibe	M	2	2	2	0	0	0	1	1	1	1	1	1	1	0	0	0	0	0	0	0	0
BF0603812	Nangouman	M	2	2	2	0	0	0	1	1	1	1	1	0	1	0	0	0	0	0	1	1	1
BF0603980	Koudiougou	M	2	2	2	0	0	0	1	1	1	1	1	1	1	0	0	1	0	0	0	0	0
BF0604071	Gonse	M	2	2	2	0	0	0	1	1	1	1	1	1	1	0	0	0	0	0	1	1	1
BF0601525	Bangleongo	M	2	2	2	0	0	0	1	1	1	1	1	1	1	0	0	0	0	0	0	0	0
BF0601754	Loussa	M	2	2	2	0	0	0	1	1	1	1	1	1	1	0	1	0	0	0	1	1	1
BF0601413	Soula	M	2	2	2	0	0	0	1	1	1	1	1	1	1	0	0	0	0	0	0	0	0
BF0601659	Godin	M	2	2	2	0	0	0	1	1	1	1	1	1	1	0	0	1	0	0	0	0	0
BF0601757	Loussa	M	2	2	2	0	0	0	1	1	1	1	1	1	1	0	0	0	0	0	0	0	0
BF0601419	Soula	M	2	2	2	0	0	0	1	1	1	1	1	1	1	0	0	0	0	0	1	1	1
BF0601534	Bangleongo	M	2	2	2	0	0	0	1	1	1	1	1	1	1	0	0	0	0	0	1	1	1
BF0601537	Bangleongo	M	2	2	2	0	0	0	1	1	1	1	1	1	1	0	0	0	0	0	1	1	1
BF0601670	Godin	M	2	2	2	0	0	0	1	1	1	0	1	1	0	0	1	0	0	0	0	1	1
BF0601714	Ipelce	M	2	2	2	0	0	0	1	1	1	1	1	1	1	0	0	0	0	0	1	1	1
BF0601770	Loussa	M	2	2	2	0	0	0	1	1	1	1	1	1	1	0	0	0	0	0	0	0	0
BF0601421	Soula	M	2	2	2	0	0	0	1	1	1	1	1	1	1	0	0	0	0	0	0	0	0
BF0601462	Koassa	M	2	2	2	0	0	0	1	1	1	1	1	1	1	0	0	0	0	0	0	0	0
BF0601778	Loussa	M	2	2	2	0	0	0	1	1	1	1	1	1	1	0	0	0	0	0	0	0	0
BF0601781	Loussa	M	2	2	2	0	0	0	1	1	1	1	1	1	1	0	0	0	0	0	1	1	1
BF0601553	Tuili	M	2	2	2	0	0	0	1	1	1	1	1	1	1	0	0	0	0	0	0	0	0
BF0601783	Loussa	M	2	2	2	0	0	0	1	1	1	1	1	1	1	0	0	0	0	0	0	0	0
BF0601523	Bangleongo	M	2	2	2	0	0	0	1	1	1	1	1	1	1	0	1	0	0	0	0	0	0
BF0601749	Ipelce	M	2	2	2	0	0	0	1	1	1	0	0	0	0	0	0	0	0	0	1	1	1
BF0601471	Koassa	M	2	2	2	0	0	0	1	1	1	1	1	1	1	0	0	0	0	0	1	1	0
BF0602634	Niongho	M	2	2	2	0	0	0	1	1	1	0	0	0	0	0	0	0	0	0	0	2	2
BF0602690	Dapeleogo	M	2	2	2	0	0	0	1	1	1	1	1	1	1	0	1	0	0	0	0	0	0
BF0602854	KaioboCentre	M	2	2	2	0	0	0	1	1	1	1	1	1	1	0	0	1	0	0	0	0	0
BF0602648	Niongho	M	2	2	2	0	0	0	1	1	1	0	0	0	0	0	0	0	0	0	0	1	1
BF0602694	Dapeleogo	M	2	2	2	0	0	0	1	1	1	1	1	0	1	0	0	0	0	0	0	0	0
BF0602420	Boura-Yakin	M	2	2	2	0	0	0	1	1	1	1	1	1	1	0	0	0	0	0	0	0	0
BF0602480	Goudri	M	2	2	2	0	0	0	1	1	1	1	1	1	1	0	0	1	0	0	0	1	1
BF0602650	Niongho	M	2	2	2	0	0	0	1	1	1	1	1	1	1	0	0	0	0	0	1	1	1
BF0602484	Goudri	M	2	2	2	0	0	0	1	1	1	1	1	1	1	0	0	0	0	0	0	0	0
BF0602876	KaioboCentre	M	2	2	2	0	0	0	1	1	1	1	1	1	1	0	1	0	0	0	0	1	1
BF0602486	Goudri	M	2	2	2	0	0	0	1	1	1	1	1	1	1	0	0	0	0	0	1	1	1
BF0602488	Goudri	M	2	2	2	0	0	0	1	1	1	0	1	1	0	0	0	0	0	0	0	0	0
BF0602406	Boura-Yakin	M	2	2	2	0	0	0	1	1	1	1	1	1	1	0	0	0	0	0	0	0	0
BF0602446	Boura-Yakin	M	2	2	2	0	0	0	1	1	1	1	1	0	1	0	0	0	0	0	0	0	0
BF0602464	Goudri	M	2	2	2	0	0	0	1	1	1	1	1	1	1	0	0	0	0	0	1	1	1
BF0600958	Kombissiri	M	2	2	2	0	0	0	1	1	1	1	1	1	1	0	0	0	0	0	0	0	0
BF0601148	Kierma	M	2	2	2	0	0	0	1	1	1	1	1	1	1	0	0	0	0	0	0	1	1
BF0601168	Kierma	M	2	2	2	0	0	0	1	1	1	1	1	1	1	0	0	0	0	0	1	1	1
BF0601250	Sabraogo	M	2	2	2	0	0	0	1	1	1	1	1	1	1	0	1	0	0	0	0	0	0
BF0600960	Kombissiri	M	2	2	2	0	0	0	1	1	1	1	1	1	1	0	0	0	0	0	0	0	0
BF0600961	Kombissiri	M	2	2	2	0	0	0	1	1	1	1	1	1	1	0	0	0	0	0	0	0	0
BF0601106	Gonce	M	2	2	2	0	0	0	1	1	1	1	1	1	1	0	0	0	0	0	0	0	0
BF0601152	Kierma	M	2	2	2	0	0	0	1	1	1	1	1	1	1	0	0	0	0	0	1	1	1
BF0601171	Kierma	M	2	2	2	0	0	0	1	1	1	1	1	1	1	0	0	0	0	0	0	0	0
BF0601050	Lamzondo	M	2	2	2	0	0	0	1	1	1	1	1	1	1	0	0	0	0	0	0	0	0
BF0601132	Gonce	M	2	2	2	0	0	0	1	1	1	1	1	1	1	0	1	1	0	0	0	0	0
BF0601155	Kierma	M	2	2	2	0	0	0	1	1	1	0	0	0	0	0	0	0	0	0	0	0	0
BF0601271	Sabraogo	M	2	2	2	0	0	0	1	1	1	1	1	1	1	0	0	0	0	0	0	0	0
BF0601031	Lamzondo	M	2	2	2	0	0	0	1	1	1	0	0	0	0	0	0	0	0	0	1	1	1
BF0601133	Gonce	M	2	2	2	0	0	0	1	1	1	0	0	0	0	0	0	0	0	0	0	0	0
BF0601186	Kierma	M	2	2	2	0	0	0	1	1	1	1	1	1	1	0	1	0	0	0	0	0	0
BF0601277	Sabraogo	M	2	2	2	0	0	0	1	1	1	1	1	1	1	0	0	0	0	0	1	1	2
BF0601033	Lamzondo	M	2	2	2	0	0	0	1	1	1	1	1	1	1	0	0	0	0	0	1	1	1
BF0601063	Gonce	M	2	2	2	0	0	0	1	1	1	1	1	1	1	0	0	0	0	0	1	1	1
BF0601087	Gonce	M	2	2	2	0	0	0	1	1	1	1	1	1	1	0	1	0	0	0	0	0	0
BF0601401	Soula	M	2	2	2	0	0	0	1	1	1	1	1	1	1	0	0	0	0	0	0	0	0
BF0601089	Gonce	M	2	2	2	0	0	0	1	1	1	1	1	1	1	0	0	0	0	0	0	0	0
BF0601165	Kierma	M	2	2	2	0	0	0	1	1	1	0	0	0	0	0	0	0	0	0	1	1	1
BF0601198	Sabraogo	M	2	2	2	0	0	0	1	1	1	1	1	1	1	0	1	0	0	0	0	0	0
BF0601300	Kasondo	M	2	2	2	0	0	0	1	1	1	0	0	0	0	0	0	0	0	0	0	0	0
BF0601404	Soula	M	2	2	2	0	0	0	1	1	1	1	1	1	1	0	0	0	0	0	0	0	0
BF0601166	Kierma	M	2	2	2	0	0	0	1	1	1	1	1	1	1	0	0	0	0	0	1	1	1
BF0601406	Soula	M	2	2	2	0	0	0	1	1	1	0	0	0	0	0	0	0	0	0	0	0	0
BF0601039	Lamzondo	M	2	2	2	0	0	0	1	1	1	1	1	1	1	0	1	0	0	0	0	0	0
BF0600001	Kagamzince	M	2	2	2	0	0	0	1	1	1	0	0	0	0	0	0	0	0	0	1	1	1
BF0600120	Gana	M	2	2	2	0	0	0	1	1	1	1	1	1	1	0	0	0	0	0	0	0	0
BF0600299	Koakin	M	2	2	2	0	0	0	1	1	1	1	1	1	1	0	0	0	0	0	0	0	0
BF0600005	Kagamzince	M	2	2	2	0	0	0	1	1	1	0	0	0	0	0	0	1	0	0	0	0	0
BF0600121	Gana	M	2	2	2	0	0	0	1	1	1	1	1	1	1	0	0	0	0	0	0	0	0
BF0600012	Kagamzince	M	2	2	2	0	0	0	1	1	1	0	0	0	0	0	0	0	0	0	0	0	0
BF0600024	Kagamzince	M	2	2	2	0	0	0	1	1	1	0	0	0	0	0	0	1	0	0	0	1	1
BF0600398	Masgo	M	2	2	2	0	0	0	1	1	1	1	1	1	1	0	0	0	0	0	0	0	0
BF0600028	Kagamzince	M	2	2	2	0	0	0	1	1	1	1	1	1	1	0	0	0	0	0	0	0	0
BF0600093	Pibse	M	2	2	2	0	0	0	1	1	1	1	1	1	1	0	0	0	0	0	1	1	1
BF0600042	Kagamzince	M	2	2	2	0	0	0	1	1	1	1	1	1	1	0	0	0	0	0	0	0	0
BF0600107	Gana	M	2	2	2	0	0	0	1	1	1	1	1	1	1	0	1	0	0	0	1	1	1
BF0600109	Gana	M	2	2	2	0	0	0	1	1	1	1	1	1	1	0	1	0	0	0	1	1	1
BF0600144	Gana	M	2	2	2	0	0	0	1	1	1	1	1	1	1	0	1	0	0	0	0	0	0
BF0600281	Seloghin	M	2	2	2	0	0	0	1	1	1	1	1	1	1	0	0	0	0	0	1	1	0
BF0600051	Kagamzince	M	2	2	2	0	0	0	1	1	1	1	1	1	1	0	0	0	0	0	1	1	0
BF0600345	Koakin	M	2	2	2	0	0	0	1	1	1	0	0	0	0	0	0	0	0	0	0	0	0
BF0600152	Gana	M	2	2	2	0	0	0	1	1	1	1	1	1	1	0	0	0	0	0	1	1	0
BF0600352	Koakin	M	2	2	2	0	0	0	1	1	1	0	0	0	0	0	0	1	0	0	0	1	0
BF0600076	Gana	M	2	2	2	0	0	0	1	1	1	0	1	1	0	0	1	0	0	0	0	1	1
BF0600114	Gana	M	2	2	2	0	0	0	1	1	1	0	0	0	0	0	0	0	0	0	0	0	0
BF0600118	Gana	M	2	2	2	0	0	0	1	1	1	1	1	1	1	0	0	0	0	0	0	0	0
BF0600159	Gana	M	2	2	2	0	0	0	1	1	1	0	0	0	0	0	0	0	0	0	2	2	1
BF0600294	Seloghin	M	2	2	2	0	0	0	1	1	1	1	1	1	1	0	0	0	0	0	0	1	1
BF0600364	Namymi	M	2	2	2	0	0	0	1	1	1	0	0	0	0	0	0	0	0	0	0	0	0
BF0603305	Bana	M	2	2	2	0	0	0	1	1	1	1	1	1	1	0	0	0	0	0	1	1	0
BF0603328	Bana	M	2	2	2	0	0	0	1	1	1	1	1	1	1	0	0	0	0	0	0	0	0
BF0603306	Bana	M	2	2	2	0	0	0	1	1	1	1	1	1	1	0	0	0	0	0	0	0	0
BF0603329	Bana	M	2	2	2	0	0	0	1	1	1	1	1	1	1	0	0	0	0	0	0	0	0
BF0603310	Bana	M	2	2	2	0	0	0	1	1	1	1	1	1	1	0	0	0	0	0	0	0	0
BF0603369	Souli	M	2	2	2	0	0	0	1	1	1	1	1	1	1	0	0	0	0	0	0	0	0
BF0603456	Dissomey	M	2	2	2	0	0	0	1	1	1	1	1	1	1	0	1	0	0	0	1	1	1
BF0603458	Dissomey	M	2	2	2	0	0	0	1	1	1	0	0	0	0	0	0	0	0	0	0	2	2
BF0603460	Dissomey	M	2	2	2	0	0	0	1	1	1	1	1	1	1	0	1	0	0	0	1	1	1
BF0602965	Larga	M	2	2	2	0	0	0	1	1	1	1	1	1	1	0	0	0	0	0	0	0	0
BF0603234	Wilga	M	2	2	2	0	0	0	1	1	1	1	1	1	1	0	0	1	0	0	0	0	0
BF0603462	Dissomey	M	2	2	2	0	0	0	1	1	1	1	1	1	1	0	0	1	0	0	0	0	0
BF0603318	Bana	M	2	2	2	0	0	0	1	1	1	1	1	1	1	0	0	0	0	0	1	1	0
BF0603244	Wilga	M	2	2	2	0	0	0	1	1	1	1	1	1	1	0	1	0	0	0	0	0	0
BF0603468	Dissomey	M	2	2	2	0	0	0	1	1	1	1	1	1	1	0	1	0	0	0	1	1	1
BF0603245	Wilga	M	2	2	2	0	0	0	1	1	1	0	0	0	0	0	0	0	0	0	0	0	0
BF0603356	Souli	M	2	2	2	0	0	0	1	1	1	1	1	1	1	0	0	1	0	0	0	0	0
BF0603326	Bana	M	2	2	2	0	0	0	1	1	1	1	1	1	1	0	0	0	0	0	0	0	0
BF0605086	Poessi	M	2	2	2	0	0	0	1	1	1	0	1	1	0	0	0	0	0	0	0	0	0
BF0605193	Ilyale	M	2	2	2	0	0	0	1	1	1	1	1	1	1	0	1	0	0	0	0	0	0
BF0605423	Gounda	M	2	2	2	0	0	0	1	1	1	1	1	1	1	0	0	0	0	0	0	0	0
BF0605162	Ilyale	M	2	2	2	0	0	0	1	1	1	0	0	0	0	0	0	0	0	0	1	1	1
BF0605531	Nazoanga	M	2	2	2	0	0	0	1	1	1	1	1	1	1	0	0	0	0	0	0	0	0
BF0605534	Nazoanga	M	2	2	2	0	0	0	1	1	1	1	1	1	1	0	1	0	0	0	1	1	1
BF0605288	Latanga	M	2	2	2	0	0	0	1	1	1	0	0	0	0	0	0	0	0	0	0	2	2
BF0605441	Gounda	M	2	2	2	0	0	0	1	1	1	1	1	1	1	0	1	0	0	0	1	1	1
BF0605506	Seguedin	M	2	2	2	0	0	0	1	1	1	1	1	1	1	0	0	0	0	0	1	1	2
BF0605535	Nazoanga	M	2	2	2	0	0	0	1	1	1	1	1	1	1	0	0	0	0	0	1	1	1
BF0605123	Nanoro	M	2	2	2	0	0	0	1	1	1	0	0	0	0	0	0	0	0	0	0	0	0
BF0605443	Gounda	M	2	2	2	0	0	0	1	1	1	1	1	1	1	0	0	0	0	0	0	0	0
BF0605540	Nazoanga	M	2	2	2	0	0	0	1	1	1	0	0	0	0	0	0	0	0	0	0	0	0
BF0605077	Poessi	M	2	2	2	0	0	0	1	1	1	1	1	1	1	0	1	0	0	0	1	1	0
BF0605521	Nazoanga	M	2	2	2	0	0	0	1	1	1	1	1	2	1	0	0	0	0	0	1	1	1
BF0605083	Poessi	M	2	2	2	0	0	0	1	1	1	1	1	1	1	0	0	0	0	0	1	1	1
BF0605472	Seguedin	M	2	2	2	0	0	0	1	1	1	1	1	1	1	0	1	0	0	0	1	0	0
BF0605524	Nazoanga	M	2	2	2	0	0	0	1	1	1	1	1	1	1	0	0	1	0	0	0	0	0
BF0605552	Nazoanga	M	2	2	2	0	0	0	1	1	1	1	1	1	1	0	1	0	0	0	0	1	1
BF0605129	Nanoro	M	2	2	2	0	0	0	1	1	1	1	1	1	1	0	0	0	0	0	0	0	0
BF0605525	Nazoanga	M	2	2	2	0	0	0	1	1	1	1	1	1	1	0	0	1	0	0	0	0	0
BF0605576	Zimidin	M	2	2	2	0	0	0	1	1	1	1	1	1	1	0	0	1	0	0	0	0	0
BF0600482		M	2	missing	2	0	missing	0	1	missing	1	0	missing	0	0	missing	0	0	missing	0	0	missing	2
BF0604550	Guidgretinga	M	2	2	2	0	0	0	2	0	0	1	0	0	1	0	0	0	0	0	0	2	2
BF0604996	Namymi	M	2	2	2	0	0	0	2	0	0	1	0	0	1	0	0	0	0	0	0	1	1
BF0605476	Seguedin	M	2	2	2	0	0	0	2	0	0	1	0	0	1	0	0	0	0	0	0	0	0
BF0605222	Rakounga	M	2	2	2	0	0	0	2	0	0	1	0	0	1	0	0	0	0	0	0	2	2
BF0605068	Poessi	M	2	2	2	0	0	0	2	0	0	1	0	0	1	0	0	0	0	0	0	0	0
BF0605620	Zimidin	M	2	2	2	0	0	0	2	0	0	0	0	0	0	0	0	1	0	0	0	1	1
BF0605092	Poessi	M	2	1	1	0	0	0	2	1	1	1	1	1	1	0	0	1	0	0	0	1	1
BF0601824	Niango	M	2	2	2	0	0	0	2	1	1	1	1	1	1	0	0	0	0	0	0	0	0
BF0604158	Nacombogo	M	2	2	2	0	0	0	2	1	1	1	0	0	1	0	0	0	0	0	0	0	0
BF0603804	Nangouman	M	2	2	2	0	0	0	2	1	1	1	1	1	1	0	1	0	0	0	0	1	1
BF0603972	Koudiougou	M	2	2	2	0	0	0	2	1	1	1	1	1	1	0	0	0	0	0	0	1	1
BF0605204	Ilyale	M	2	2	2	0	0	0	2	1	1	1	1	1	1	0	0	1	0	0	0	1	1
BF0605492	Seguedin	M	2	2	2	0	0	0	2	1	1	1	1	1	1	0	0	0	0	0	0	0	0
BF0600972	Kombissiri	M	2	1	1	0	0	0	2	2	1	1	1	1	1	0	0	0	0	0	0	0	0
BF0600894	Kombissiri	M	2	2	2	0	0	0	2	2	1	2	2	2	2	0	0	0	0	0	0	0	0
BF0601950	Poedogo	M	2	2	2	0	0	0	2	2	1	2	2	2	2	0	0	0	0	0	0	0	0
BF0604822	Zangogo	M	2	2	2	0	0	0	2	2	1	2	2	2	2	0	2	0	0	0	0	0	0
BF0604118	Nacombogo	M	2	2	2	0	0	0	2	2	1	2	2	2	2	0	0	0	0	0	0	0	0
BF0604176	Sidtenga	M	2	2	2	0	0	0	2	2	1	2	2	2	2	0	0	0	0	0	0	0	0
BF0603502	Tibe	M	2	2	2	0	0	0	2	2	1	2	2	2	2	0	1	0	0	0	0	0	0
BF0602887	KaioboCentre	M	2	2	2	0	0	0	2	2	1	1	1	1	1	0	2	0	0	0	0	0	0
BF0601137	Gonce	M	2	2	2	0	0	0	2	2	1	1	1	1	1	0	0	0	0	0	0	0	0
BF0600214	Guidgretinga	M	2	2	2	0	0	0	2	2	1	2	2	2	2	1	0	0	0	0	0	0	0
BF0605527	Nazoanga	M	2	2	2	0	0	0	2	2	1	2	2	2	2	0	1	0	0	0	0	0	0
BF0602094	Sakouissi	M	1	1	1	0	0	0	2	2	2	1	1	1	1	0	0	0	0	0	0	0	0
BF0601183	Kierma	M	1	1	1	0	0	0	2	2	2	0	0	0	0	0	0	0	0	0	0	0	0
BF0603397	Souli	M	1	1	1	0	0	0	2	2	2	2	2	2	2	0	1	0	0	0	0	0	0
BF0601586	Tuili	M	2	1	1	0	0	0	2	2	2	2	2	2	2	0	0	0	0	0	0	0	0
BF0600700	Siguivousse	M	2	2	2	0	0	0	2	2	2	1	1	1	1	0	0	0	0	0	1	1	1
BF0600812	Yargo	M	2	2	2	0	0	0	2	2	2	1	1	1	1	0	0	0	0	0	0	0	0
BF0600905	Kombissiri	M	2	2	2	0	0	0	2	2	2	2	2	2	2	0	0	0	0	0	0	0	0
BF0600816	Yargo	M	2	2	2	0	0	0	2	2	2	2	2	2	2	0	0	0	0	0	0	0	0
BF0600906	Kombissiri	M	2	2	2	0	0	0	2	2	2	2	2	2	2	0	0	0	0	0	0	0	0
BF0600711	Siguivousse	M	2	2	2	0	0	0	2	2	2	2	2	2	2	0	1	0	0	0	0	0	0
BF0600817	Yargo	M	2	2	2	0	0	0	2	2	2	1	1	1	1	0	0	0	0	0	1	1	1
BF0600908	Kombissiri	M	2	2	2	0	0	0	2	2	2	2	2	2	2	0	0	0	0	0	0	0	0
BF0600827	Yargo	M	2	2	2	0	0	0	2	2	2	2	2	2	2	0	0	0	0	0	0	0	0
BF0600494	Wemtenga	M	2	2	2	0	0	0	2	2	2	2	2	2	2	0	1	0	0	0	0	0	0
BF0600672	Bion	M	2	2	2	0	0	0	2	2	2	1	1	1	1	0	1	0	0	0	0	0	0
BF0600728	Siguivousse	M	2	2	2	0	0	0	2	2	2	2	2	2	2	0	2	0	0	0	0	0	0
BF0600927	Kombissiri	M	2	2	2	0	0	0	2	2	2	2	2	2	2	0	1	0	0	0	0	0	0
BF0600929	Kombissiri	M	2	2	2	0	0	0	2	2	2	1	1	1	1	0	0	0	0	0	0	0	0
BF0600802	Yargo	M	2	2	2	0	0	0	2	2	2	2	2	2	2	0	0	0	0	0	0	0	0
BF0600892	Kombissiri	M	2	2	2	0	0	0	2	2	2	1	1	1	1	0	0	0	0	0	0	0	0
BF0600804	Yargo	M	2	2	2	0	0	0	2	2	2	2	2	2	2	0	0	0	0	0	0	0	0
BF0600938	Kombissiri	M	2	2	2	0	0	0	2	2	2	1	1	1	1	0	0	0	0	0	1	1	1
BF0601790	Loussa	M	2	2	2	0	0	0	2	2	2	2	2	2	2	0	0	0	0	0	0	0	0
BF0601910	Bilbalogo	M	2	2	2	0	0	0	2	2	2	1	1	1	1	0	0	0	0	0	0	0	0
BF0601974	Poedogo	M	2	2	2	0	0	0	2	2	2	1	1	1	1	0	1	0	0	0	0	0	0
BF0602030	Kossala	M	2	2	2	0	0	0	2	2	2	1	1	1	1	0	0	0	0	0	0	0	0
BF0602220	Passebtinga	M	2	2	2	0	0	0	2	2	2	2	2	2	2	0	1	0	0	0	0	0	0
BF0602054	Kossala	M	2	2	2	0	0	0	2	2	2	1	1	1	1	0	0	0	0	0	0	0	0
BF0601832	Niango	M	2	2	2	0	0	0	2	2	2	2	2	2	2	0	1	0	0	0	0	0	0
BF0601904	Bilbalogo	M	2	2	2	0	0	0	2	2	2	2	2	2	2	0	1	0	0	0	0	0	0
BF0602202	Ganwoko	M	2	2	2	0	0	0	2	2	2	1	1	1	1	0	0	0	0	0	0	0	0
BF0604078	Gonse	M	2	2	2	0	0	0	2	2	2	2	2	2	2	0	1	0	0	0	0	0	0
BF0604132	Nacombogo	M	2	2	2	0	0	0	2	2	2	1	1	1	1	0	1	0	0	0	0	1	1
BF0604290	Binstigre	M	2	2	2	0	0	0	2	2	2	1	1	1	1	0	1	0	0	0	0	0	0
BF0604660	Doara	M	2	2	2	0	0	0	2	2	2	2	2	2	2	0	0	0	0	0	0	0	0
BF0604738	Tampuy	M	2	2	2	0	0	0	2	2	2	2	2	2	2	0	0	0	0	0	0	0	0
BF0604862	Manga	M	2	2	2	0	0	0	2	2	2	2	2	2	2	0	1	0	0	0	0	0	0
BF0604872	Manga	M	2	2	2	0	0	0	2	2	2	1	1	1	1	0	1	0	0	0	0	0	0
BF0604177	Sidtenga	M	2	2	2	0	0	0	2	2	2	1	1	1	1	0	0	0	0	0	1	1	1
BF0604884	Manga	M	2	2	2	0	0	0	2	2	2	2	2	2	2	0	2	0	0	0	0	0	0
BF0604896	Manga	M	2	2	2	0	0	0	2	2	2	2	2	2	2	0	0	0	0	0	0	0	0
BF0604192	Sidtenga	M	2	2	2	0	0	0	2	2	2	2	2	2	2	0	0	0	0	0	0	0	0
BF0603819	Nangouman	M	2	2	2	0	0	0	2	2	2	2	2	2	2	0	1	0	0	0	0	0	0
BF0603704	Boura-Toemissin	M	2	2	2	0	0	0	2	2	2	2	2	2	2	0	1	0	0	0	0	0	0
BF0603706	Boura-Toemissin	M	2	2	2	0	0	0	2	2	2	2	2	2	2	0	0	0	0	0	0	0	0
BF0603506	Tibe	M	2	2	2	0	0	0	2	2	2	2	2	2	2	0	0	0	0	0	0	0	0
BF0603516	Tibe	M	2	2	2	0	0	0	2	2	2	2	2	2	2	0	1	0	0	0	0	0	0
BF0603850	Nangouman	M	2	2	2	0	0	0	2	2	2	2	2	2	2	1	0	0	0	0	0	0	0
BF0604060	Gonse	M	2	2	2	0	0	0	2	2	2	2	2	2	2	0	1	0	0	0	0	0	0
BF0603864	BonGoumBarga	M	2	2	2	0	0	0	2	2	2	2	2	2	2	0	0	0	0	0	0	0	0
BF0603808	Nangouman	M	2	2	2	0	0	0	2	2	2	2	2	2	2	0	1	0	0	0	0	0	0
BF0604066	Gonse	M	2	2	2	0	0	0	2	2	2	2	2	2	2	0	0	0	0	0	0	0	0
BF0601410	Soula	M	2	2	2	0	0	0	2	2	2	1	1	1	1	0	1	0	0	0	0	0	0
BF0601546	Bangleongo	M	2	2	2	0	0	0	2	2	2	2	2	2	2	0	0	0	0	0	0	0	0
BF0601425	Soula	M	2	2	2	0	0	0	2	2	2	1	1	0	1	0	0	0	0	0	1	1	1
BF0601601	Tuili	M	2	2	2	0	0	0	2	2	2	1	1	1	1	0	1	0	0	0	1	2	1
BF0601429	Soula	M	2	2	2	0	0	0	2	2	2	1	1	1	1	0	1	0	0	0	0	0	0
BF0602416	Boura-Yakin	M	2	2	2	0	0	0	2	2	2	1	1	1	1	0	0	0	0	0	0	0	0
BF0602856	KaioboCentre	M	2	2	2	0	0	0	2	2	2	1	1	1	1	0	1	0	0	0	0	0	0
BF0602424	Boura-Yakin	M	2	2	2	0	0	0	2	2	2	1	0	0	1	0	0	0	0	0	0	0	1
BF0602888	KaioboCentre	M	2	2	2	0	0	0	2	2	2	1	1	1	1	0	0	0	0	0	0	1	1
BF0602808	Togse	M	2	2	2	0	0	0	2	2	2	2	2	2	2	0	2	0	0	0	0	0	0
BF0602444	Boura-Yakin	M	2	2	2	0	0	0	2	2	2	2	2	2	2	0	1	0	0	0	0	0	0
BF0602492	Goudri	M	2	2	2	0	0	0	2	2	2	2	2	2	2	0	0	0	0	0	0	0	0
BF0600995	Lamzondo	M	2	2	2	0	0	0	2	2	2	1	1	1	1	0	0	0	0	0	0	0	0
BF0601098	Gonce	M	2	2	2	0	0	0	2	2	2	1	1	1	1	0	1	0	0	0	0	0	0
BF0601317	Kasondo	M	2	2	2	0	0	0	2	2	2	2	2	2	2	0	1	0	0	0	0	0	0
BF0601150	Kierma	M	2	2	2	0	0	0	2	2	2	1	1	1	1	0	0	0	0	0	0	0	0
BF0600997	Lamzondo	M	2	2	2	0	0	0	2	2	2	1	1	1	1	0	0	0	0	0	1	1	1
BF0600970	Kombissiri	M	2	2	2	0	0	0	2	2	2	1	1	1	1	0	0	0	0	0	0	0	0
BF0601000	Lamzondo	M	2	2	2	0	0	0	2	2	2	2	1	1	2	0	0	0	0	0	0	1	1
BF0601046	Lamzondo	M	2	2	2	0	0	0	2	2	2	1	1	1	1	0	0	1	0	0	0	1	1
BF0601110	Gonce	M	2	2	2	0	0	0	2	2	2	2	2	2	2	0	0	0	0	0	0	0	0
BF0601154	Kierma	M	2	2	2	0	0	0	2	2	2	2	2	2	2	0	0	0	0	0	0	0	0
BF0601174	Kierma	M	2	2	2	0	0	0	2	2	2	2	2	2	2	0	1	0	0	0	0	0	0
BF0601362	Kasondo	M	2	2	2	0	0	0	2	2	2	2	2	2	2	0	0	0	0	0	0	0	0
BF0600973	Kombissiri	M	2	2	2	0	0	0	2	2	2	2	2	2	2	0	0	0	0	0	0	0	0
BF0600978	Lamzondo	M	2	2	2	0	0	0	2	2	2	2	2	2	2	0	0	0	0	0	0	0	0
BF0601062	Gonce	M	2	2	2	0	0	0	2	2	2	2	2	2	2	1	0	0	0	0	0	0	0
BF0601158	Kierma	M	2	2	2	0	0	0	2	2	2	2	2	2	2	0	0	0	0	0	0	0	0
BF0601400	Soula	M	2	2	2	0	0	0	2	2	2	2	2	2	2	0	0	0	0	0	0	0	0
BF0600982	Lamzondo	M	2	2	2	0	0	0	2	2	2	1	1	1	1	0	0	0	0	0	0	0	0
BF0601035	Lamzondo	M	2	2	2	0	0	0	2	2	2	1	1	1	1	0	1	0	0	0	0	0	0
BF0601036	Lamzondo	M	2	2	2	0	0	0	2	2	2	2	2	2	2	0	0	0	0	0	0	0	0
BF0601140	Gonce	M	2	2	2	0	0	0	2	2	2	2	2	2	2	0	1	0	0	0	0	0	0
BF0600986	Lamzondo	M	2	2	2	0	0	0	2	2	2	2	2	2	2	1	0	0	0	0	0	0	0
BF0601146	Kierma	M	2	2	2	0	0	0	2	2	2	1	1	1	1	0	1	0	0	0	0	0	0
BF0601204	Sabraogo	M	2	2	2	0	0	0	2	2	2	1	1	1	1	0	0	0	0	0	0	0	0
BF0600993	Lamzondo	M	2	2	2	0	0	0	2	2	2	2	2	2	2	0	1	0	0	0	0	0	0
BF0601096	Gonce	M	2	2	2	0	0	0	2	2	2	2	2	2	2	0	1	0	0	0	0	0	0
BF0601147	Kierma	M	2	2	2	0	0	0	2	2	2	2	2	2	2	0	1	0	0	0	0	0	0
BF0600132	Gana	M	2	2	2	0	0	0	2	2	2	2	2	2	2	0	1	0	0	0	0	0	0
BF0600445	Masgo	M	2	2	2	0	0	0	2	2	2	2	2	2	2	0	0	0	0	0	0	0	0
BF0600133	Gana	M	2	2	2	0	0	0	2	2	2	2	2	2	2	0	0	0	0	0	0	0	0
BF0600035	Kagamzince	M	2	2	2	0	0	0	2	2	2	2	2	2	2	0	0	0	0	0	0	0	0
BF0600339	Koakin	M	2	2	2	0	0	0	2	2	2	2	2	2	2	0	1	0	0	0	0	0	0
BF0600195	Guidgretinga	M	2	2	2	0	0	0	2	2	2	1	1	0	1	0	0	0	0	0	0	0	0
BF0600284	Seloghin	M	2	2	2	0	0	0	2	2	2	2	2	2	2	0	0	0	0	0	0	0	0
BF0600356	Namymi	M	2	2	2	0	0	0	2	2	2	2	2	2	2	0	0	0	0	0	0	0	0
BF0600080	Gana	M	2	2	2	0	0	0	2	2	2	2	2	2	2	0	0	0	0	0	0	0	0
BF0603361	Souli	M	2	2	2	0	0	0	2	2	2	2	2	2	2	0	0	0	0	0	0	0	0
BF0603333	Bana	M	2	2	2	0	0	0	2	2	2	2	2	2	2	0	1	0	0	0	0	0	0
BF0603336	Bana	M	2	2	2	0	0	0	2	2	2	2	2	2	2	0	0	0	0	0	0	0	0
BF0603223	Wilga	M	2	2	2	0	0	0	2	2	2	2	2	2	2	1	0	0	0	0	0	0	0
BF0603314	Bana	M	2	2	2	0	0	0	2	2	2	2	2	2	2	0	0	0	0	0	0	0	0
BF0603315	Bana	M	2	2	2	0	0	0	2	2	2	1	1	1	1	0	0	0	0	0	0	0	0
BF0603340	Bana	M	2	2	2	0	0	0	2	2	2	1	1	2	1	0	0	0	0	0	0	0	0
BF0603341	Bana	M	2	2	2	0	0	0	2	2	2	2	2	2	2	0	1	0	0	0	0	0	0
BF0603243	Wilga	M	2	2	2	0	0	0	2	2	2	2	2	2	2	0	1	0	0	0	0	0	0
BF0603343	Bana	M	2	2	2	0	0	0	2	2	2	2	2	2	2	1	0	0	0	0	0	0	0
BF0603466	Dissomey	M	2	2	2	0	0	0	2	2	2	2	2	2	2	0	0	0	0	0	0	0	0
BF0603323	Bana	M	2	2	2	0	0	0	2	2	2	2	2	2	2	0	0	0	0	0	0	0	0
BF0603301	Bana	M	2	2	2	0	0	0	2	2	2	2	2	2	2	0	0	0	0	0	0	0	0
BF0605584	Zimidin	M	2	2	2	0	0	0	2	2	2	2	2	2	2	0	1	0	0	0	0	0	0
BF0605478	Seguedin	M	2	2	2	0	0	0	2	2	2	1	1	1	1	0	0	0	0	0	0	0	0
BF0605586	Zimidin	M	2	2	2	0	0	0	2	2	2	2	2	2	2	0	1	0	0	0	0	0	0
BF0605480	Seguedin	M	2	2	2	0	0	0	2	2	2	2	2	2	2	0	0	0	0	0	0	0	0
BF0605528	Nazoanga	M	2	2	2	0	0	0	2	2	2	2	2	2	2	0	0	0	0	0	0	0	0
BF0605588	Zimidin	M	2	2	2	0	0	0	2	2	2	1	1	1	1	0	0	1	0	0	0	0	0
BF0605430	Gounda	M	2	2	2	0	0	0	2	2	2	2	2	2	2	0	1	0	0	0	0	0	0
BF0605529	Nazoanga	M	2	2	2	0	0	0	2	2	2	2	2	2	2	0	0	0	0	0	0	0	0
BF0605589	Zimidin	M	2	2	2	0	0	0	2	2	2	1	1	1	1	0	0	0	0	0	0	0	0
BF0605113	Nanoro	M	2	2	2	0	0	0	2	2	2	1	1	1	1	0	0	0	0	0	1	1	1
BF0605431	Gounda	M	2	2	2	0	0	0	2	2	2	2	2	2	2	0	0	0	0	0	0	0	0
BF0605494	Seguedin	M	2	2	2	0	0	0	2	2	2	2	2	2	2	0	1	0	0	0	0	0	0
BF0605595	Zimidin	M	2	2	2	0	0	0	2	2	2	1	1	1	1	0	0	0	0	0	0	0	0
BF0605437	Gounda	M	2	2	2	0	0	0	2	2	2	1	1	1	1	0	0	0	0	0	0	0	0
BF0605502	Seguedin	M	2	2	2	0	0	0	2	2	2	2	2	2	2	0	0	0	0	0	0	0	0
BF0605602	Zimidin	M	2	2	2	0	0	0	2	2	2	2	2	2	2	0	1	0	0	0	0	0	0
BF0605071	Poessi	M	2	2	2	0	0	0	2	2	2	1	1	1	1	0	0	0	0	0	0	0	0
BF0605606	Zimidin	M	2	2	2	0	0	0	2	2	2	2	2	2	2	0	1	0	0	0	0	0	0
BF0605177	Ilyale	M	2	2	2	0	0	0	2	2	2	2	2	2	2	0	0	0	0	0	0	0	0
BF0605352	Pella	M	2	2	2	0	0	0	2	2	2	2	2	2	2	0	1	0	0	0	0	0	0
BF0605084	Poessi	M	2	2	2	0	0	0	2	2	2	2	2	2	2	0	1	0	0	0	0	0	0
BF0601986		M	2	missing	2	0	missing	0	2	missing	1	1	missing	1	1	missing	0	0	missing	0	0	missing	0
BF0605404	Kourono	M	2	2	missing	0	0	missing	0	0	missing	0	0	missing	0	0	missing	0	0	missing	1	1	missing
BF0605526	Nazoanga	M	2	2	missing	0	0	missing	0	0	missing	0	0	missing	0	0	missing	0	0	missing	0	0	missing
BF0603493	Dissomey	M	2	2	missing	0	0	missing	1	1	missing	1	1	missing	1	0	missing	0	0	missing	0	0	missing
BF0603488	Dissomey	M	2	2	missing	0	0	missing	2	1	missing	1	1	missing	1	0	missing	0	0	missing	0	1	missing
BF0603760	Barse	S	1	1	1	0	0	0	0	0	0	0	0	0	0	0	0	0	0	0	0	0	0
BF0603161	Guirgo	S	1	1	1	0	0	0	0	0	0	0	0	0	0	0	0	0	0	0	0	0	0
BF0600624	Kambo	S	2	1	1	0	0	0	0	0	0	0	0	0	0	0	1	0	0	0	0	0	0
BF0600558	Kambo	S	2	1	1	0	0	0	0	0	0	0	0	0	0	0	0	0	0	0	0	0	0
BF0601448	Koassa	S	2	1	1	0	0	0	0	0	0	0	0	0	0	0	0	0	0	0	0	0	0
BF0600378	Masgo	S	2	1	1	0	0	0	0	0	0	0	0	0	0	0	1	0	0	0	0	0	0
BF0600697	Bion	S	2	2	2	0	0	0	0	0	0	0	1	0	0	0	0	0	0	0	0	0	0
BF0601813	Niango	S	2	2	2	0	0	0	0	0	0	0	0	0	0	0	0	0	0	0	0	0	0
BF0602351	Bakaogo	S	2	2	2	0	0	0	0	0	0	0	0	0	0	0	1	0	0	0	0	0	0
BF0604126	Nacombogo	S	2	2	2	0	0	0	0	0	0	0	0	0	0	0	0	0	0	0	0	0	0
BF0601582	Tuili	S	2	2	2	0	0	0	0	0	0	0	0	0	0	0	0	0	0	0	0	0	0
BF0601515	Bangleongo	S	2	2	2	0	0	0	0	0	0	0	0	0	0	0	0	0	0	0	0	0	0
BF0602432	Boura-Yakin	S	2	2	2	0	0	0	0	0	0	0	0	0	0	0	0	0	0	0	1	1	2
BF0602803	Togse	S	2	2	2	0	0	0	0	0	0	0	0	0	0	0	0	0	0	0	0	0	0
BF0601191	Kierma	S	2	2	2	0	0	0	0	0	0	0	0	0	0	0	0	0	0	0	0	0	0
BF0602924	Teyoko	S	2	2	2	0	0	0	0	0	0	0	0	0	0	0	0	0	0	0	0	0	0
BF0605048	Toundou	S	2	2	2	0	0	0	0	0	0	0	0	0	0	0	0	0	0	0	0	0	0
BF0603682	Guere	S	0	0	0	0	0	0	0	2	2	0	0	0	0	0	0	0	0	0	0	0	0
BF0602056	Kossala	S	1	1	1	0	0	0	0	2	2	0	0	0	0	0	0	0	0	0	0	0	0
BF0602042	Kossala	S	2	1	1	0	0	0	0	2	2	0	0	0	0	0	0	0	0	0	0	0	0
BF0600692	Bion	S	2	2	2	0	0	0	0	2	2	0	0	0	0	0	0	0	0	0	0	0	0
BF0601852	Niango	S	2	2	2	0	0	0	0	2	2	0	0	0	0	0	0	0	0	0	0	0	0
BF0602058	Kossala	S	2	2	2	0	0	0	0	2	2	0	0	0	0	0	0	0	0	0	0	0	0
BF0605624	Kona	S	2	2	2	0	0	0	0	2	2	0	0	0	0	0	0	1	0	0	0	0	0
BF0601734	Ipelce	S	2	1	1	0	0	0	1	1	0	0	0	0	0	0	0	0	0	0	0	0	0
BF0601578	Tuili	S	2	2	2	0	0	0	1	1	0	1	0	1	1	1	1	1	1	1	0	0	0
BF0600739	Siguivousse	S	1	1	1	0	0	0	1	1	1	1	0	0	1	1	1	1	1	1	0	0	0
BF0602028	Kossala	S	1	1	1	0	0	0	1	1	1	0	0	0	0	0	0	0	0	0	0	0	0
BF0601978	Poedogo	S	1	1	1	0	0	0	1	1	1	0	0	0	0	0	0	0	0	0	0	0	0
BF0604081	Gonse	S	1	1	1	0	0	0	1	1	1	0	0	0	0	0	0	0	0	0	0	0	0
BF0604745	Tampuy	S	1	1	1	0	0	0	1	1	1	0	0	0	0	0	0	0	0	0	0	0	0
BF0603957	Koudiougou	S	1	1	1	0	0	0	1	1	1	0	0	0	0	0	0	0	0	0	0	0	0
BF0601447	Koassa	S	1	1	1	0	0	0	1	1	1	0	0	0	0	0	0	0	0	0	0	0	0
BF0601528	Bangleongo	S	1	1	1	0	0	0	1	1	1	0	0	0	0	0	0	0	0	0	0	0	0
BF0601463	Koassa	S	1	1	1	0	0	0	1	1	1	0	0	0	0	0	0	0	0	0	0	0	0
BF0602529	Bedogo	S	1	1	1	0	0	0	1	1	1	0	0	0	0	0	0	0	0	0	0	0	0
BF0602703	Dapeleogo	S	1	1	1	0	0	0	1	1	1	0	0	1	0	0	0	0	0	0	0	0	0
BF0602433	Boura-Yakin	S	1	1	1	0	0	0	1	1	1	0	0	0	0	0	0	0	0	0	0	0	0
BF0601161	Kierma	S	1	1	1	0	0	0	1	1	1	0	0	0	0	0	0	0	0	0	0	0	0
BF0600209	Guidgretinga	S	1	1	1	0	0	0	1	1	1	1	0	0	1	1	1	1	1	1	0	0	0
BF0602927	Teyoko	S	1	1	1	0	0	0	1	1	1	0	0	0	0	0	0	0	0	0	0	0	0
BF0603221	Wilga	S	1	1	1	0	0	0	1	1	1	0	0	0	0	0	0	0	0	0	0	0	0
BF0600756	Binsboubou	S	2	1	1	0	0	0	1	1	1	0	0	0	0	0	1	0	0	0	0	0	0
BF0600614	Nobili	S	2	1	1	0	0	0	1	1	1	0	0	0	0	0	0	0	0	0	0	0	0
BF0600634	Kambo	S	2	1	1	0	0	0	1	1	1	0	0	0	0	0	0	0	0	0	0	0	0
BF0602020	Kossala	S	2	1	1	0	0	0	1	1	1	0	0	0	0	0	0	0	0	0	0	0	0
BF0602210	Ganwoko	S	2	1	1	0	0	0	1	1	1	0	0	0	0	0	0	0	0	0	0	0	0
BF0602318	Sarogo	S	2	1	1	0	0	0	1	1	1	0	0	0	0	0	0	0	0	0	0	0	0
BF0602224	Passebtinga	S	2	1	1	0	0	0	1	1	1	0	0	0	0	0	0	0	0	0	0	0	0
BF0602048	Kossala	S	2	1	1	0	0	0	1	1	1	0	0	0	0	0	0	0	0	0	0	0	0
BF0602184	Ganwoko	S	2	1	1	0	0	0	1	1	1	0	0	0	0	0	0	0	0	0	0	0	0
BF0604220	Tamsin	S	2	1	1	0	0	0	1	1	1	0	0	0	0	0	0	0	0	0	0	0	0
BF0604228	Tamsin	S	2	1	1	0	0	0	1	1	1	0	0	0	0	0	0	0	0	0	0	0	0
BF0604324	Kongrissince	S	2	1	1	0	0	0	1	1	1	0	0	0	0	0	0	0	0	0	0	0	0
BF0604130	Nacombogo	S	2	1	1	0	0	0	1	1	1	0	0	0	0	0	0	0	0	0	0	0	0
BF0603672	Guere	S	2	1	1	0	0	0	1	1	1	0	0	0	0	0	0	0	0	0	0	0	0
BF0603680	Guere	S	2	1	1	0	0	0	1	1	1	0	0	0	0	0	0	0	0	0	0	0	0
BF0603614	Tamse	S	2	1	1	0	0	0	1	1	1	0	0	0	0	0	0	0	0	0	0	0	0
BF0601658	Godin	S	2	1	1	0	0	0	1	1	1	1	0	0	1	0	1	0	1	1	1	0	0
BF0601576	Tuili	S	2	1	1	0	0	0	1	1	1	0	0	0	0	0	0	0	0	0	0	0	0
BF0602540	Bedogo	S	2	1	1	0	0	0	1	1	1	0	0	0	0	0	1	0	0	0	0	0	0
BF0602702	Dapeleogo	S	2	1	1	0	0	0	1	1	1	0	0	0	0	0	0	0	0	0	0	0	0
BF0602376	Bakaogo	S	2	1	1	0	0	0	1	1	1	0	0	0	0	0	0	0	0	0	0	0	0
BF0602806	Togse	S	2	1	1	0	0	0	1	1	1	0	0	0	0	0	1	0	0	0	0	0	0
BF0602586	Lamzoussi	S	2	1	1	0	0	0	1	1	1	0	0	0	0	0	0	0	0	0	0	0	0
BF0602408	Boura-Yakin	S	2	1	1	0	0	0	1	1	1	0	0	0	0	0	0	0	0	0	0	0	0
BF0602590	Lamzoussi	S	2	1	1	0	0	0	1	1	1	0	0	0	0	0	0	0	0	0	0	0	0
BF0601284	Sabraogo	S	2	1	1	0	0	0	1	1	1	0	0	0	0	0	0	0	0	0	0	0	0
BF0601408	Soula	S	2	1	1	0	0	0	1	1	1	0	0	0	0	0	0	0	0	0	0	0	0
BF0600104	Gana	S	2	1	1	0	0	0	1	1	1	0	0	0	0	0	0	0	0	0	0	0	0
BF0603134	Ragadogo	S	2	1	1	0	0	0	1	1	1	0	0	0	0	0	0	0	0	0	0	0	0
BF0603036	Zaptinga	S	2	1	1	0	0	0	1	1	1	0	0	0	0	0	0	0	0	0	0	0	0
BF0603372	Souli	S	2	1	1	0	0	0	1	1	1	0	0	0	0	0	0	0	0	0	0	0	0
BF0602946	Teyoko	S	2	1	1	0	0	0	1	1	1	0	0	0	0	0	0	0	0	0	0	0	0
BF0603148	Ragadogo	S	2	1	1	0	0	0	1	1	1	0	0	0	0	0	0	0	0	0	0	0	0
BF0603168	Guirgo	S	2	1	1	0	0	0	1	1	1	1	0	0	1	0	0	0	0	0	0	0	0
BF0602974	Larga	S	2	1	1	0	0	0	1	1	1	0	1	0	0	0	0	0	0	0	0	0	0
BF0600526	Wemtenga	S	2	2	2	0	0	0	1	1	1	0	0	0	0	0	0	0	0	0	0	0	0
BF0600588	Nobili	S	2	2	2	0	0	0	1	1	1	0	0	0	0	0	0	0	0	0	0	0	0
BF0600600	Nobili	S	2	2	2	0	0	0	1	1	1	0	0	0	0	0	0	0	0	0	0	0	0
BF0600763	Binsboubou	S	2	2	2	0	0	0	1	1	1	0	0	0	0	0	0	0	0	0	0	0	0
BF0600493	Wemtenga	S	2	2	2	0	0	0	1	1	1	0	0	0	0	0	0	0	0	0	0	0	0
BF0600668	Bion	S	2	2	2	0	0	0	1	1	1	0	0	0	0	0	0	0	0	0	0	0	0
BF0600716	Siguivousse	S	2	2	2	0	0	0	1	1	1	0	0	0	0	0	0	0	0	0	0	0	0
BF0600764	Binsboubou	S	2	2	2	0	0	0	1	1	1	0	0	0	0	0	0	0	0	0	0	0	0
BF0600610	Nobili	S	2	2	2	0	0	0	1	1	1	0	0	0	0	0	0	0	0	0	0	0	0
BF0600670	Bion	S	2	2	2	0	0	0	1	1	1	0	0	0	0	0	0	0	0	0	0	0	0
BF0600720	Siguivousse	S	2	2	2	0	0	0	1	1	1	0	0	0	0	0	0	0	0	0	0	0	0
BF0600874	Konnekongo	S	2	2	2	0	0	0	1	1	1	0	0	0	0	0	1	0	0	0	0	0	0
BF0600550	Kambo	S	2	2	2	0	0	0	1	1	1	0	0	0	0	0	1	0	0	0	0	0	0
BF0600613	Nobili	S	2	2	2	0	0	0	1	1	1	0	0	0	0	0	0	0	0	0	0	0	0
BF0600786	Binsboubou	S	2	2	2	0	0	0	1	1	1	0	0	0	0	0	0	0	0	0	0	0	0
BF0600881	Konnekongo	S	2	2	2	0	0	0	1	1	1	0	0	0	0	0	0	0	0	0	0	0	0
BF0600500	Wemtenga	S	2	2	2	0	0	0	1	1	1	0	0	0	0	0	0	0	0	0	0	0	0
BF0600686	Bion	S	2	2	2	0	0	0	1	1	1	0	0	0	0	0	0	0	0	0	0	0	0
BF0600787	Binsboubou	S	2	2	2	0	0	0	1	1	1	0	0	1	0	0	0	0	0	0	0	0	0
BF0600688	Bion	S	2	2	2	0	0	0	1	1	1	0	0	0	0	0	0	0	0	0	0	0	0
BF0600625	Kambo	S	2	2	2	0	0	0	1	1	1	0	0	0	0	0	0	0	0	0	0	0	0
BF0600694	Bion	S	2	2	2	0	0	0	1	1	1	0	0	0	0	0	0	0	0	0	0	0	0
BF0600749	Binsboubou	S	2	2	2	0	0	0	1	1	1	0	0	0	0	0	0	0	0	0	0	0	0
BF0600936	Kombissiri	S	2	2	2	0	0	0	1	1	1	0	0	0	0	0	0	0	0	0	0	0	0
BF0600569	Kambo	S	2	2	2	0	0	0	1	1	1	0	0	0	0	0	0	0	0	0	0	0	0
BF0600640	Kambo	S	2	2	2	0	0	0	1	1	1	0	0	0	0	0	0	0	0	0	0	0	0
BF0600578	Nobili	S	2	2	2	0	0	0	1	1	1	0	0	0	0	0	0	0	0	0	0	0	0
BF0602096	Sakouissi	S	2	2	2	0	0	0	1	1	1	1	1	1	1	0	1	1	0	0	0	1	1
BF0602292	Sarogo	S	2	2	2	0	0	0	1	1	1	0	0	0	0	0	0	0	0	0	0	0	0
BF0601794	Loussa	S	2	2	2	0	0	0	1	1	1	0	0	0	0	0	0	0	0	0	0	0	0
BF0602308	Sarogo	S	2	2	2	0	0	0	1	1	1	0	1	0	0	0	0	0	0	0	0	0	0
BF0601795	Loussa	S	2	2	2	0	0	0	1	1	1	0	0	0	0	0	0	0	0	0	0	0	0
BF0601850	Niango	S	2	2	2	0	0	0	1	1	1	0	0	0	0	0	0	0	0	0	0	0	0
BF0602336	Sarogo	S	2	2	2	0	0	0	1	1	1	0	0	0	0	0	1	0	0	0	0	0	0
BF0601815	Niango	S	2	2	2	0	0	0	1	1	1	0	1	0	0	0	0	0	0	0	0	0	0
BF0601982	Poedogo	S	2	2	2	0	0	0	1	1	1	0	0	0	0	0	1	0	0	0	0	0	0
BF0602046	Kossala	S	2	2	2	0	0	0	1	1	1	0	0	0	0	0	0	0	0	0	0	0	0
BF0601821	Niango	S	2	2	2	0	0	0	1	1	1	0	0	0	0	0	0	0	0	0	0	0	0
BF0602180	Ganwoko	S	2	2	2	0	0	0	1	1	1	0	0	0	0	0	0	0	0	0	0	0	0
BF0601937	Bilbalogo	S	2	2	2	0	0	0	1	1	1	0	1	0	0	0	0	0	0	0	0	0	0
BF0602344	Sarogo	S	2	2	2	0	0	0	1	1	1	0	0	0	0	0	0	0	0	0	0	0	0
BF0601866	Bilbalogo	S	2	2	2	0	0	0	1	1	1	0	0	0	0	0	0	0	0	0	0	0	0
BF0601948	Poedogo	S	2	2	2	0	0	0	1	1	1	0	0	0	0	0	0	0	0	0	0	0	0
BF0602186	Ganwoko	S	2	2	2	0	0	0	1	1	1	0	0	0	0	0	0	0	0	0	0	0	0
BF0601992	Poedogo	S	2	2	2	0	0	0	1	1	1	0	0	0	0	0	0	0	0	0	0	0	0
BF0602352	Bakaogo	S	2	2	2	0	0	0	1	1	1	0	0	0	0	0	0	0	0	0	0	0	0
BF0601960	Poedogo	S	2	2	2	0	0	0	1	1	1	0	0	0	0	0	0	0	0	0	0	0	0
BF0602090	Sakouissi	S	2	2	2	0	0	0	1	1	1	1	1	1	1	0	0	0	0	0	0	0	0
BF0602258	Passebtinga	S	2	2	2	0	0	0	1	1	1	0	0	0	0	0	0	0	0	0	0	0	0
BF0602357	Bakaogo	S	2	2	2	0	0	0	1	1	1	0	0	0	0	0	1	0	0	0	0	0	0
BF0602018	Kossala	S	2	2	2	0	0	0	1	1	1	0	0	0	0	0	0	0	0	0	0	0	0
BF0602204	Ganwoko	S	2	2	2	0	0	0	1	1	1	0	0	0	0	0	0	0	0	0	0	0	0
BF0602358	Bakaogo	S	2	2	2	0	0	0	1	1	1	0	0	0	0	0	0	0	0	0	0	0	0
BF0604810	Zangogo	S	2	2	2	0	0	0	1	1	1	0	0	0	0	0	0	0	0	0	0	0	0
BF0604359	Kongrissince	S	2	2	2	0	0	0	1	1	1	0	0	0	0	0	0	0	0	0	0	0	0
BF0604144	Nacombogo	S	2	2	2	0	0	0	1	1	1	0	0	0	0	0	0	0	0	0	0	0	0
BF0604372	Doncin	S	2	2	2	0	0	0	1	1	1	0	0	0	0	0	0	0	0	0	0	0	0
BF0604502	Zagable	S	2	2	2	0	0	0	1	1	1	0	0	0	0	0	0	0	0	0	0	0	0
BF0604236	Tamsin	S	2	2	2	0	0	0	1	1	1	0	0	0	0	0	0	0	0	0	0	0	0
BF0604382	Doncin	S	2	2	2	0	0	0	1	1	1	0	0	0	0	0	0	0	0	0	0	0	0
BF0604664	Doara	S	2	2	2	0	0	0	1	1	1	1	0	0	1	0	0	0	0	0	0	0	0
BF0604852	Manga	S	2	2	2	0	0	0	1	1	1	0	0	0	0	0	0	0	0	0	0	0	0
BF0604092	Gonse	S	2	2	2	0	0	0	1	1	1	0	0	0	0	0	0	0	0	0	0	0	0
BF0604242	Tamsin	S	2	2	2	0	0	0	1	1	1	0	0	0	0	0	0	0	0	0	0	0	0
BF0604402	Doncin	S	2	2	2	0	0	0	1	1	1	0	0	0	0	0	0	0	0	0	0	0	0
BF0604556	Guidgretinga	S	2	2	2	0	0	0	1	1	1	0	0	0	0	0	0	0	0	0	0	0	0
BF0604246	Tamsin	S	2	2	2	0	0	0	1	1	1	0	0	1	0	0	0	0	0	0	0	0	0
BF0604408	Doncin	S	2	2	2	0	0	0	1	1	1	0	0	0	0	0	0	0	0	0	0	0	0
BF0604254	Tamsin	S	2	2	2	0	0	0	1	1	1	0	0	0	0	0	0	0	0	0	0	0	0
BF0604454	Kongbaga	S	2	2	2	0	0	0	1	1	1	0	0	0	0	0	0	0	0	0	0	0	0
BF0604458	Kongbaga	S	2	2	2	0	0	0	1	1	1	0	0	0	0	0	0	0	0	0	0	0	0
BF0604636	Doara	S	2	2	2	0	0	0	1	1	1	0	0	0	0	0	0	0	0	0	0	0	0
BF0604640	Doara	S	2	2	2	0	0	0	1	1	1	0	0	0	0	0	0	0	0	0	0	0	0
BF0604902	Siguivousse	S	2	2	2	0	0	0	1	1	1	0	0	0	0	0	0	0	0	0	0	0	0
BF0603620	Tamse	S	2	2	2	0	0	0	1	1	1	0	0	0	0	0	0	0	0	0	0	0	0
BF0603752	Barse	S	2	2	2	0	0	0	1	1	1	0	0	0	0	0	1	0	0	0	0	0	0
BF0603890	BonGoumBarga	S	2	2	2	0	0	0	1	1	1	0	0	0	0	0	0	0	0	0	0	0	0
BF0603903	Kalwiga	S	2	2	2	0	0	0	1	1	1	0	0	0	0	0	0	0	0	0	0	0	0
BF0603578	Goubla	S	2	2	2	0	0	0	1	1	1	0	0	0	0	0	0	0	0	0	0	0	0
BF0603787	Barse	S	2	2	2	0	0	0	1	1	1	0	0	0	0	0	0	0	0	0	0	0	0
BF0603630	Tamse	S	2	2	2	0	0	0	1	1	1	0	0	0	0	0	0	0	0	0	0	0	0
BF0603592	Goubla	S	2	2	2	0	0	0	1	1	1	0	0	0	0	0	0	0	0	0	0	0	0
BF0603710	Boura-Toemissin	S	2	2	2	0	0	0	1	1	1	0	0	0	0	0	0	0	0	0	0	0	0
BF0603924	Kalwiga	S	2	2	2	0	0	0	1	1	1	0	0	0	0	0	0	0	0	0	0	0	0
BF0603676	Guere	S	2	2	2	0	0	0	1	1	1	0	0	0	0	0	0	0	0	0	0	0	0
BF0603536	Tibe	S	2	2	2	0	0	0	1	1	1	0	0	0	0	0	0	0	0	0	0	0	0
BF0603598	Goubla	S	2	2	2	0	0	0	1	1	1	0	0	0	0	0	0	0	0	0	0	0	0
BF0603960	Koudiougou	S	2	2	2	0	0	0	1	1	1	0	0	0	0	0	0	0	0	0	0	0	0
BF0603866	BonGoumBarga	S	2	2	2	0	0	0	1	1	1	1	0	0	1	0	0	0	0	0	0	0	0
BF0603874	BonGoumBarga	S	2	2	2	0	0	0	1	1	1	1	0	0	1	0	0	0	0	0	1	0	0
BF0601433	Koassa	S	2	2	2	0	0	0	1	1	1	0	0	0	0	0	0	0	0	0	0	0	0
BF0601708	Ipelce	S	2	2	2	0	0	0	1	1	1	0	0	0	0	0	0	0	0	0	0	0	0
BF0601482	Koassa	S	2	2	2	0	0	0	1	1	1	0	0	0	0	0	1	0	0	0	0	0	0
BF0601710	Ipelce	S	2	2	2	0	0	0	1	1	1	0	0	0	0	0	0	0	0	0	0	0	0
BF0601414	Soula	S	2	2	2	0	0	0	1	1	1	0	0	0	0	0	0	0	0	0	0	0	0
BF0601527	Bangleongo	S	2	2	2	0	0	0	1	1	1	0	0	0	0	0	0	0	0	0	0	0	0
BF0601711	Ipelce	S	2	2	2	0	0	0	1	1	1	0	0	0	0	0	0	0	0	0	0	0	0
BF0601499	Bangleongo	S	2	2	2	0	0	0	1	1	1	0	0	0	0	0	0	0	0	0	0	0	0
BF0601574	Tuili	S	2	2	2	0	0	0	1	1	1	0	0	0	0	0	0	0	0	0	0	0	0
BF0601420	Soula	S	2	2	2	0	0	0	1	1	1	0	0	0	0	0	0	0	0	0	0	0	0
BF0601507	Bangleongo	S	2	2	2	0	0	0	1	1	1	0	0	0	0	0	0	0	0	0	0	0	0
BF0601538	Bangleongo	S	2	2	2	0	0	0	1	1	1	0	0	0	0	0	0	0	0	0	0	0	0
BF0601717	Ipelce	S	2	2	2	0	0	0	1	1	1	0	0	0	0	0	0	0	0	0	0	0	0
BF0601584	Tuili	S	2	2	2	0	0	0	1	1	1	0	0	0	0	0	0	0	0	0	0	0	0
BF0601678	Godin	S	2	2	2	0	0	0	1	1	1	0	0	0	0	0	0	0	0	0	0	0	0
BF0601720	Ipelce	S	2	2	2	0	0	0	1	1	1	0	0	0	0	0	0	0	0	0	0	0	0
BF0601687	Godin	S	2	2	2	0	0	0	1	1	1	0	0	0	0	0	1	0	0	0	0	0	0
BF0601465	Koassa	S	2	2	2	0	0	0	1	1	1	0	1	1	0	0	0	0	0	0	0	0	0
BF0601589	Tuili	S	2	2	2	0	0	0	1	1	1	0	0	0	0	0	0	0	0	0	0	0	0
BF0601699	Ipelce	S	2	2	2	0	0	0	1	1	1	0	0	0	0	0	0	0	0	0	0	0	0
BF0601426	Soula	S	2	2	2	0	0	0	1	1	1	0	0	0	0	0	1	0	0	0	0	0	0
BF0601702	Ipelce	S	2	2	2	0	0	0	1	1	1	0	0	0	0	0	0	0	0	0	0	0	0
BF0601784	Loussa	S	2	2	2	0	0	0	1	1	1	0	0	0	0	0	0	0	0	0	0	0	0
BF0601557	Tuili	S	2	2	2	0	0	0	1	1	1	0	0	0	0	0	0	0	0	0	0	0	0
BF0601606	Tuili	S	2	2	2	0	0	0	1	1	1	0	0	0	0	0	0	0	0	0	0	0	0
BF0601703	Ipelce	S	2	2	2	0	0	0	1	1	1	0	0	0	0	0	0	0	0	0	0	0	0
BF0601788	Loussa	S	2	2	2	0	0	0	1	1	1	0	0	0	0	0	1	0	0	0	0	0	0
BF0602594	Lamzoussi	S	2	2	2	0	0	0	1	1	1	0	0	0	0	0	0	0	0	0	0	0	0
BF0602677	Dapeleogo	S	2	2	2	0	0	0	1	1	1	0	0	0	0	0	0	0	0	0	0	0	0
BF0602760	Ragamsin	S	2	2	2	0	0	0	1	1	1	0	0	0	0	0	0	0	0	0	0	0	0
BF0602361	Bakaogo	S	2	2	2	0	0	0	1	1	1	0	0	0	0	0	0	0	0	0	0	0	0
BF0602412	Boura-Yakin	S	2	2	2	0	0	0	1	1	1	1	1	0	1	0	1	0	0	0	0	0	0
BF0602474	Goudri	S	2	2	2	0	0	0	1	1	1	0	0	0	0	0	1	0	0	0	0	0	0
BF0602362	Bakaogo	S	2	2	2	0	0	0	1	1	1	0	0	0	0	0	0	0	0	0	0	0	0
BF0602476	Goudri	S	2	2	2	0	0	0	1	1	1	1	0	0	1	0	0	0	0	0	0	0	0
BF0602534	Bedogo	S	2	2	2	0	0	0	1	1	1	0	0	0	0	0	0	0	0	0	0	0	0
BF0602374	Bakaogo	S	2	2	2	0	0	0	1	1	1	0	0	0	0	0	0	0	0	0	0	0	0
BF0602654	Niongho	S	2	2	2	0	0	0	1	1	1	0	0	0	0	0	0	0	0	0	0	0	0
BF0602774	Ragamsin	S	2	2	2	0	0	0	1	1	1	0	0	0	0	0	0	0	0	0	0	0	0
BF0602378	Bakaogo	S	2	2	2	0	0	0	1	1	1	0	0	0	0	0	0	0	0	0	0	0	0
BF0602544	Bedogo	S	2	2	2	0	0	0	1	1	1	0	0	0	0	0	0	0	0	0	0	0	0
BF0602705	Dapeleogo	S	2	2	2	0	0	0	1	1	1	0	0	0	0	0	0	0	0	0	0	0	0
BF0602805	Togse	S	2	2	2	0	0	0	1	1	1	0	0	0	0	0	0	0	0	0	0	0	0
BF0602380	Bakaogo	S	2	2	2	0	0	0	1	1	1	0	0	0	0	0	0	0	0	0	0	0	0
BF0602549	Bedogo	S	2	2	2	0	0	0	1	1	1	0	0	0	0	0	0	0	0	0	0	0	0
BF0602392	Bakaogo	S	2	2	2	0	0	0	1	1	1	1	0	0	1	0	1	0	0	0	1	1	1
BF0602436	Boura-Yakin	S	2	2	2	0	0	0	1	1	1	0	0	0	0	0	0	0	0	0	0	0	0
BF0602668	Niongho	S	2	2	2	0	0	0	1	1	1	0	0	0	0	0	0	0	0	0	0	0	0
BF0602742	Ragamsin	S	2	2	2	0	0	0	1	1	1	0	0	0	0	0	0	0	0	0	0	0	0
BF0602892	KaioboCentre	S	2	2	2	0	0	0	1	1	1	0	0	0	0	0	0	0	0	0	0	0	0
BF0602398	Bakaogo	S	2	2	2	0	0	0	1	1	1	0	0	0	0	0	0	0	0	0	0	0	0
BF0602670	Niongho	S	2	2	2	0	0	0	1	1	1	0	0	0	0	0	1	0	0	0	0	0	0
BF0602744	Ragamsin	S	2	2	2	0	0	0	1	1	1	0	0	0	0	0	0	0	0	0	0	0	0
BF0602497	Goudri	S	2	2	2	0	0	0	1	1	1	0	0	0	0	0	0	0	0	0	0	0	0
BF0602588	Lamzoussi	S	2	2	2	0	0	0	1	1	1	0	0	1	0	0	0	1	0	0	0	0	0
BF0602672	Dapeleogo	S	2	2	2	0	0	0	1	1	1	0	0	0	0	0	0	0	0	0	0	0	0
BF0602832	Togse	S	2	2	2	0	0	0	1	1	1	1	0	0	1	0	0	0	0	0	0	0	0
BF0602675	Dapeleogo	S	2	2	2	0	0	0	1	1	1	0	0	0	0	0	0	0	0	0	0	0	0
BF0602758	Ragamsin	S	2	2	2	0	0	0	1	1	1	0	0	0	0	0	0	0	0	0	0	0	0
BF0602834	Togse	S	2	2	2	0	0	0	1	1	1	0	0	0	0	0	0	0	0	0	0	0	0
BF0601042	Lamzondo	S	2	2	2	0	0	0	1	1	1	0	0	0	0	0	0	0	0	0	0	0	0
BF0601329	Kasondo	S	2	2	2	0	0	0	1	1	1	0	0	0	0	0	0	0	0	0	0	0	0
BF0601261	Sabraogo	S	2	2	2	0	0	0	1	1	1	0	0	0	0	0	0	0	0	0	0	0	0
BF0601335	Kasondo	S	2	2	2	0	0	0	1	1	1	0	0	0	0	0	0	0	0	0	0	0	0
BF0601367	Soula	S	2	2	2	0	0	0	1	1	1	0	0	0	0	0	0	0	0	0	0	0	0
BF0601275	Sabraogo	S	2	2	2	0	0	0	1	1	1	0	0	0	0	0	0	0	0	0	0	0	0
BF0601376	Soula	S	2	2	2	0	0	0	1	1	1	0	1	0	0	0	0	0	0	0	0	0	0
BF0601290	Sabraogo	S	2	2	2	0	0	0	1	1	1	0	0	0	0	0	0	0	0	0	0	0	0
BF0601214	Sabraogo	S	2	2	2	0	0	0	1	1	1	0	0	0	0	0	0	0	0	0	0	0	0
BF0601316	Kasondo	S	2	2	2	0	0	0	1	1	1	0	0	0	0	0	0	0	0	0	0	0	0
BF0600230	Seloghin	S	2	2	2	0	0	0	1	1	1	0	0	0	0	0	0	0	0	0	0	0	0
BF0600235	Seloghin	S	2	2	2	0	0	0	1	1	1	0	0	0	0	0	0	0	0	0	0	0	0
BF0600441	Masgo	S	2	2	2	0	0	0	1	1	1	0	0	0	0	0	0	0	0	0	0	0	0
BF0600176	Guidgretinga	S	2	2	2	0	0	0	1	1	1	0	0	0	0	0	0	0	0	0	0	0	0
BF0600237	Seloghin	S	2	2	2	0	0	0	1	1	1	1	1	0	1	1	1	1	1	1	0	0	0
BF0600392	Namymi	S	2	2	2	0	0	0	1	1	1	0	0	0	0	0	0	0	0	0	0	0	0
BF0600443	Masgo	S	2	2	2	0	0	0	1	1	1	0	0	0	0	0	0	0	0	0	0	0	0
BF0600092	Pibse	S	2	2	2	0	0	0	1	1	1	0	0	0	0	0	0	0	0	0	0	0	0
BF0600183	Toundou	S	2	2	2	0	0	0	1	1	1	0	0	1	0	0	0	0	0	0	0	0	0
BF0600334	Koakin	S	2	2	2	0	0	0	1	1	1	0	0	0	0	0	0	0	0	0	0	0	0
BF0600257	Seloghin	S	2	2	2	0	0	0	1	1	1	0	0	0	0	0	0	0	0	0	0	0	0
BF0600400	Masgo	S	2	2	2	0	0	0	1	1	1	0	0	0	0	0	1	0	0	0	0	0	0
BF0600450	Masgo	S	2	2	2	0	0	0	1	1	1	0	0	0	0	0	0	0	0	0	0	0	0
BF0600274	Koakin	S	2	2	2	0	0	0	1	1	1	0	0	0	0	0	0	0	0	0	0	0	0
BF0600452	Masgo	S	2	2	2	0	0	0	1	1	1	1	0	0	1	1	1	1	1	1	0	0	0
BF0600341	Koakin	S	2	2	2	0	0	0	1	1	1	0	0	0	0	0	0	0	0	0	0	0	0
BF0600406	Masgo	S	2	2	2	0	0	0	1	1	1	0	0	1	0	0	0	0	0	0	0	0	0
BF0600454	Masgo	S	2	2	2	0	0	0	1	1	1	0	0	0	0	0	1	0	0	0	0	0	0
BF0600455	Masgo	S	2	2	2	0	0	0	1	1	1	0	0	0	0	0	0	0	0	0	0	0	0
BF0600110	Gana	S	2	2	2	0	0	0	1	1	1	0	0	0	0	0	1	0	0	0	0	0	0
BF0600456	Masgo	S	2	2	2	0	0	0	1	1	1	0	0	0	0	0	0	0	0	0	0	0	0
BF0600072	Pibse	S	2	2	2	0	0	0	1	1	1	0	0	0	0	0	0	0	0	0	0	0	0
BF0600415	Masgo	S	2	2	2	0	0	0	1	1	1	0	0	0	0	0	0	0	0	0	0	0	0
BF0600424	Masgo	S	2	2	2	0	0	0	1	1	1	0	0	0	0	0	0	0	0	0	0	0	0
BF0600474	Wemtenga	S	2	2	2	0	0	0	1	1	1	0	0	0	0	0	0	0	0	0	0	0	0
BF0600220	Seloghin	S	2	2	2	0	0	0	1	1	1	0	0	0	0	0	0	0	0	0	0	0	0
BF0600432	Masgo	S	2	2	2	0	0	0	1	1	1	0	0	0	0	0	0	0	0	0	0	0	0
BF0602922	Teyoko	S	2	2	2	0	0	0	1	1	1	0	0	0	0	0	0	0	0	0	0	0	0
BF0603327	Bana	S	2	2	2	0	0	0	1	1	1	0	0	1	0	0	0	0	0	0	0	0	0
BF0603006	Zaptinga	S	2	2	2	0	0	0	1	1	1	0	0	0	0	0	0	0	0	0	0	0	0
BF0603209	Wilga	S	2	2	2	0	0	0	1	1	1	0	0	0	0	0	0	0	0	0	0	0	0
BF0603140	Ragadogo	S	2	2	2	0	0	0	1	1	1	0	0	0	0	0	0	0	0	0	0	0	0
BF0603213	Wilga	S	2	2	2	0	0	0	1	1	1	0	0	0	0	0	0	0	0	0	0	0	0
BF0603436	ToeBanega	S	2	2	2	0	0	0	1	1	1	0	0	0	0	0	0	0	0	0	0	0	0
BF0603028	Zaptinga	S	2	2	2	0	0	0	1	1	1	0	0	0	0	0	0	0	0	0	0	0	0
BF0602940	Teyoko	S	2	2	2	0	0	0	1	1	1	0	0	0	0	0	0	0	0	0	0	0	0
BF0603146	Ragadogo	S	2	2	2	0	0	0	1	1	1	0	0	0	0	0	0	0	0	0	0	0	0
BF0603222	Wilga	S	2	2	2	0	0	0	1	1	1	0	0	0	0	0	1	0	0	0	0	0	0
BF0603376	Souli	S	2	2	2	0	0	0	1	1	1	0	0	0	0	0	1	0	0	0	0	0	0
BF0602959	Larga	S	2	2	2	0	0	0	1	1	1	0	0	0	0	0	0	0	0	0	0	0	0
BF0603050	Garance	S	2	2	2	0	0	0	1	1	1	0	0	0	0	0	0	0	0	0	0	0	0
BF0603229	Wilga	S	2	2	2	0	0	0	1	1	1	0	0	0	0	0	0	0	0	0	0	0	0
BF0603377	Souli	S	2	2	2	0	0	0	1	1	1	0	0	0	0	0	0	0	0	0	0	0	0
BF0603058	Garance	S	2	2	2	0	0	0	1	1	1	0	0	0	0	0	0	0	0	0	0	0	0
BF0603380	Souli	S	2	2	2	0	0	0	1	1	1	0	0	0	0	0	0	1	0	0	0	0	0
BF0602970	Larga	S	2	2	2	0	0	0	1	1	1	0	0	0	0	0	0	0	0	0	0	0	0
BF0603072	Garance	S	2	2	2	0	0	0	1	1	1	0	0	0	0	0	0	0	0	0	0	0	0
BF0603104	Ragadogo	S	2	2	2	0	0	0	1	1	1	0	0	0	0	0	0	0	0	0	0	0	0
BF0603203	Wilga	S	2	2	2	0	0	0	1	1	1	0	0	0	0	0	0	0	0	0	0	0	0
BF0603478	Dissomey	S	2	2	2	0	0	0	1	1	1	0	0	0	0	0	0	0	0	0	0	0	0
BF0605191	Ilyale	S	2	2	2	0	0	0	1	1	1	0	0	0	0	0	0	0	0	0	0	0	0
BF0605145	Nanoro	S	2	2	2	0	0	0	1	1	1	0	0	0	0	0	0	0	0	0	0	0	0
BF0605026	Toundou	S	2	2	2	0	0	0	1	1	1	0	0	0	0	0	0	0	0	0	0	0	0
BF0605166	Ilyale	S	2	2	2	0	0	0	1	1	1	0	0	0	0	0	0	0	0	0	0	0	0
BF0605248	Rakounga	S	2	2	2	0	0	0	1	1	1	0	0	0	0	0	0	0	0	0	0	0	0
BF0605046	Toundou	S	2	2	2	0	0	0	1	1	1	0	0	0	0	0	0	0	0	0	0	0	0
BF0605125	Nanoro	S	2	2	2	0	0	0	1	1	1	0	0	0	0	0	0	0	0	0	0	0	0
BF0605456	Gounda	S	2	2	2	0	0	0	1	1	1	0	0	0	0	0	0	0	0	0	0	0	0
BF0605126	Nanoro	S	2	2	2	0	0	0	1	1	1	0	0	0	0	0	0	0	0	0	0	0	0
BF0605178	Ilyale	S	2	2	2	0	0	0	1	1	1	0	0	0	0	0	0	0	0	0	0	0	0
BF0605398	Kourono	S	2	2	2	0	0	0	1	1	1	0	0	0	0	0	0	0	0	0	0	0	0
BF0600175	Guidgretinga	S	1	1	1	0	0	0	1	1	2	0	0	0	0	0	0	0	0	0	0	0	0
BF0602572	Lamzoussi	S	2	2	2	0	0	0	1	1	2	0	0	0	0	0	0	0	0	0	0	0	0
BF0601266	Sabraogo	S	2	2	2	0	0	0	1	1	2	0	0	0	0	0	0	0	0	0	0	0	0
BF0600082	Pibse	S	1	1	1	0	0	0	1	2	2	0	0	0	0	0	0	0	0	0	0	0	0
BF0601858	Niango	S	2	1	1	0	0	0	1	2	2	0	0	0	0	0	0	0	0	0	0	0	0
BF0602698	Dapeleogo	S	2	1	1	0	0	0	1	2	2	0	0	0	0	0	0	1	0	0	0	0	0
BF0600788	Binsboubou	S	2	2	2	0	0	0	1	2	2	0	0	0	0	0	0	0	0	0	0	0	0
BF0601854	Niango	S	2	2	2	0	0	0	1	2	2	0	0	0	0	0	0	0	0	0	0	0	0
BF0604238	Tamsin	S	2	2	2	0	0	0	1	2	2	1	0	0	1	0	0	0	0	0	0	0	0
BF0602502	Goudri	S	2	2	2	0	0	0	1	2	2	1	1	0	1	1	1	1	1	1	0	0	0
BF0603454	Dissomey	S	2	2	2	0	0	0	1	2	2	0	0	0	0	0	0	0	0	0	0	0	0
BF0605038	Toundou	S	2	2	2	0	0	0	1	2	2	0	0	0	0	0	0	0	0	0	0	0	0
BF0600207		S	2	missing	2	0	missing	0	1	missing	1	0	missing	0	0	missing	0	0	missing	0	0	missing	0
BF0600525		S	2	missing	2	0	missing	0	1	missing	1	0	missing	0	0	missing	0	0	missing	0	0	missing	0
BF0600583		S	2	missing	2	0	missing	0	1	missing	1	0	missing	0	0	missing	0	0	missing	0	0	missing	0
BF0601422	Soula	S	1	1	1	0	0	0	2	0	0	0	0	0	0	0	0	0	0	0	0	0	0
BF0604716	Tampuy	S	1	1	1	0	0	0	2	1	1	1	0	0	1	0	0	0	0	0	0	0	0
BF0603422	ToeBanega	S	1	1	1	0	0	0	2	1	1	0	0	0	0	0	0	0	0	0	0	0	0
BF0605344	Pella	S	2	1	1	0	0	0	2	1	1	1	0	0	1	0	0	0	0	0	0	0	0
BF0604520	Zagable	S	2	2	2	0	0	0	2	1	1	1	1	0	1	0	0	0	0	0	0	0	0
BF0603708	Boura-Toemissin	S	2	2	2	0	0	0	2	1	1	1	0	0	1	0	0	0	0	0	0	0	0
BF0603530	Tibe	S	2	2	2	0	0	0	2	1	1	1	0	0	1	0	0	0	0	0	0	0	0
BF0601418	Soula	S	2	2	2	0	0	0	2	1	1	0	0	0	0	0	0	1	0	0	0	0	0
BF0605338	Pella	S	2	2	2	0	0	0	2	1	1	1	0	0	1	1	1	0	1	1	0	0	0
BF0605128	Nanoro	S	2	2	2	0	0	0	2	1	1	1	0	0	1	0	1	0	0	0	0	0	0
BF0600662	Bion	S	1	1	1	0	0	0	2	2	2	0	0	0	0	0	0	0	0	0	0	0	0
BF0600663	Bion	S	1	1	1	0	0	0	2	2	2	0	0	0	0	0	1	0	0	0	0	0	0
BF0600785	Binsboubou	S	1	1	1	0	0	0	2	2	2	0	0	0	0	0	0	0	0	0	0	0	0
BF0600735	Siguivousse	S	1	1	1	0	0	0	2	2	2	0	0	0	0	0	0	0	0	0	0	0	0
BF0600889	Konnekongo	S	1	1	1	0	0	0	2	2	2	0	0	0	0	0	0	0	0	0	0	0	0
BF0601964	Poedogo	S	1	1	1	0	0	0	2	2	2	0	0	0	0	0	0	0	0	0	0	0	0
BF0601914	Bilbalogo	S	1	1	1	0	0	0	2	2	2	0	0	0	0	0	0	0	0	0	0	0	0
BF0601919	Bilbalogo	S	1	1	1	0	0	0	2	2	2	0	0	0	0	0	0	0	0	0	0	0	0
BF0601928	Bilbalogo	S	1	1	1	0	0	0	2	2	2	1	0	0	1	1	0	1	1	1	0	0	0
BF0602226	Passebtinga	S	1	1	1	0	0	0	2	2	2	0	0	0	0	0	0	0	0	0	0	0	0
BF0601835	Niango	S	1	1	1	0	0	0	2	2	2	0	0	0	0	0	0	0	0	0	0	0	0
BF0601907	Bilbalogo	S	1	1	1	0	0	0	2	2	2	0	0	0	0	0	0	0	0	0	0	0	0
BF0602288	Sarogo	S	1	1	1	0	0	0	2	2	2	0	0	0	0	0	0	0	0	0	0	0	0
BF0604195	Sidtenga	S	1	1	1	0	0	0	2	2	2	0	0	0	0	0	0	0	0	0	0	0	0
BF0604651	Doara	S	1	1	1	0	0	0	2	2	2	0	0	0	0	0	0	0	0	0	0	0	0
BF0604091	Gonse	S	1	1	1	0	0	0	2	2	2	0	0	1	0	0	0	0	0	0	0	0	0
BF0604751	Tampuy	S	1	1	1	0	0	0	2	2	2	0	0	0	0	0	0	0	0	0	0	0	0
BF0603557	Goubla	S	1	1	1	0	0	0	2	2	2	0	0	0	0	0	0	0	0	0	0	0	0
BF0603558	Goubla	S	1	1	1	0	0	0	2	2	2	1	0	0	1	0	0	0	0	0	0	0	0
BF0603628	Tamse	S	1	1	1	0	0	0	2	2	2	1	0	0	1	0	1	0	0	0	0	0	0
BF0603705	Boura-Toemissin	S	1	1	1	0	0	0	2	2	2	0	0	0	0	0	1	0	0	0	0	0	0
BF0604017	Boulare	S	1	1	1	0	0	0	2	2	2	0	0	0	0	0	0	0	0	0	0	0	0
BF0603629	Tamse	S	1	1	1	0	0	0	2	2	2	1	0	0	1	1	1	1	1	1	0	0	0
BF0603790	Barse	S	1	1	1	0	0	0	2	2	2	0	0	0	0	0	0	0	0	0	0	0	0
BF0603912	Kalwiga	S	1	1	1	0	0	0	2	2	2	0	0	0	0	0	0	0	0	0	0	0	0
BF0603806	Nangouman	S	1	1	1	0	0	0	2	2	2	0	0	0	0	0	0	0	0	0	0	0	0
BF0603678	Guere	S	1	1	1	0	0	0	2	2	2	1	0	0	1	0	0	0	0	0	0	0	0
BF0603807	Nangouman	S	1	1	1	0	0	0	2	2	2	0	0	0	0	0	0	0	0	0	0	0	0
BF0601712	Ipelce	S	1	1	1	0	0	0	2	2	2	0	0	0	0	0	0	0	0	0	0	0	0
BF0601713	Ipelce	S	1	1	1	0	0	0	2	2	2	0	0	0	0	0	0	0	0	0	0	0	0
BF0601760	Loussa	S	1	1	1	0	0	0	2	2	2	0	0	0	0	0	0	0	0	0	0	0	0
BF0601505	Bangleongo	S	1	1	1	0	0	0	2	2	2	0	0	0	0	0	1	0	0	0	0	0	0
BF0601455	Koassa	S	1	1	1	0	0	0	2	2	2	0	0	0	0	0	0	0	0	0	0	0	0
BF0601677	Godin	S	1	1	1	0	0	0	2	2	2	0	0	0	0	0	0	0	0	0	0	0	0
BF0601541	Bangleongo	S	1	1	1	0	0	0	2	2	2	0	0	0	0	0	1	0	0	0	0	0	0
BF0602359	Bakaogo	S	1	1	1	0	0	0	2	2	2	0	0	0	0	0	0	0	0	0	0	0	0
BF0602522	Bedogo	S	1	1	1	0	0	0	2	2	2	0	0	0	0	0	0	0	0	0	0	0	0
BF0602764	Ragamsin	S	1	1	1	0	0	0	2	2	2	0	0	0	0	0	0	0	0	0	0	0	0
BF0600091	Pibse	S	1	1	1	0	0	0	2	2	2	0	0	0	0	0	0	0	0	0	0	0	0
BF0600241	Seloghin	S	1	1	1	0	0	0	2	2	2	1	1	0	1	1	1	1	1	1	0	0	0
BF0600187	Toundou	S	1	1	1	0	0	0	2	2	2	0	0	0	0	0	0	0	0	0	0	0	0
BF0600193	Guidgretinga	S	1	1	1	0	0	0	2	2	2	0	0	1	0	0	0	0	0	0	0	0	0
BF0605167	Ilyale	S	1	1	1	0	0	0	2	2	2	0	0	0	0	0	0	0	0	0	0	0	0
BF0605185	Ilyale	S	1	1	1	0	0	0	2	2	2	0	0	0	0	0	0	0	0	0	0	0	0
BF0601510	Bangleongo	S	1	2	2	0	0	0	2	2	2	0	0	0	0	0	0	0	0	0	0	0	0
BF0602862	KaioboCentre	S	1	2	2	0	0	0	2	2	2	0	0	0	0	1	1	1	1	1	0	0	0
BF0600556	Kambo	S	2	1	1	0	0	0	2	2	2	1	0	0	1	1	1	0	0	0	0	0	0
BF0604218	Tamsin	S	2	1	1	0	0	0	2	2	2	1	0	0	1	1	1	1	1	1	0	0	0
BF0604820	Zangogo	S	2	1	1	0	0	0	2	2	2	1	0	0	1	1	1	0	0	0	0	0	0
BF0604388	Doncin	S	2	1	1	0	0	0	2	2	2	1	0	0	1	1	1	0	0	0	0	0	0
BF0601436	Koassa	S	2	1	1	0	0	0	2	2	2	2	0	0	2	0	1	0	0	0	0	0	0
BF0601516	Bangleongo	S	2	1	1	0	0	0	2	2	2	1	0	0	1	1	1	0	0	0	0	0	0
BF0602542	Bedogo	S	2	1	1	0	0	0	2	2	2	2	0	0	2	0	0	0	0	0	0	0	0
BF0603048	Garance	S	2	1	1	0	0	0	2	2	2	1	0	0	1	1	1	0	0	0	0	0	0
BF0603150	Ragadogo	S	2	1	1	0	0	0	2	2	2	1	0	0	1	1	1	1	1	1	0	0	0
BF0603418	ToeBanega	S	2	1	1	0	0	0	2	2	2	1	1	0	1	0	1	0	0	0	0	0	0
BF0600884	Konnekongo	S	2	2	2	0	0	0	2	2	2	1	0	0	1	0	0	0	0	0	0	0	0
BF0601966	Poedogo	S	2	2	2	0	0	0	2	2	2	1	0	0	1	1	1	0	0	0	1	0	0
BF0601800	Loussa	S	2	2	2	0	0	0	2	2	2	1	0	0	1	0	0	0	0	0	0	0	0
BF0601930	Bilbalogo	S	2	2	2	0	0	0	2	2	2	1	0	0	1	0	1	1	1	1	0	0	0
BF0601990	Poedogo	S	2	2	2	0	0	0	2	2	2	2	0	0	2	0	0	0	0	0	0	0	0
BF0604352	Kongrissince	S	2	2	2	0	0	0	2	2	2	1	0	0	1	0	0	0	0	0	0	0	0
BF0604488	Zagable	S	2	2	2	0	0	0	2	2	2	1	0	0	1	0	0	0	0	0	0	0	0
BF0604506	Zagable	S	2	2	2	0	0	0	2	2	2	1	0	0	1	0	0	0	0	0	0	0	0
BF0604832	Zangogo	S	2	2	2	0	0	0	2	2	2	1	0	0	1	1	1	0	1	1	0	0	0
BF0604320	Kongrissince	S	2	2	2	0	0	0	2	2	2	1	0	0	1	0	0	0	0	0	0	0	0
BF0604097	Gonse	S	2	2	2	0	0	0	2	2	2	1	0	0	1	1	1	1	1	1	0	0	0
BF0604120	Nacombogo	S	2	2	2	0	0	0	2	2	2	1	0	0	1	1	1	1	1	1	0	0	0
BF0604744	Tampuy	S	2	2	2	0	0	0	2	2	2	1	0	0	1	1	0	0	1	1	0	0	0
BF0604336	Kongrissince	S	2	2	2	0	0	0	2	2	2	1	0	0	1	1	1	1	1	1	0	0	0
BF0604348	Kongrissince	S	2	2	2	0	0	0	2	2	2	1	0	0	1	0	0	0	0	0	0	0	0
BF0604460	Kongbaga	S	2	2	2	0	0	0	2	2	2	1	0	0	1	0	0	0	0	0	0	0	0
BF0604010	Boulare	S	2	2	2	0	0	0	2	2	2	0	0	0	0	0	0	0	0	0	1	0	0
BF0603776	Barse	S	2	2	2	0	0	0	2	2	2	1	0	0	1	0	0	0	0	0	0	0	0
BF0603904	Kalwiga	S	2	2	2	0	0	0	2	2	2	1	0	0	1	1	1	0	0	0	0	0	0
BF0604034	Boulare	S	2	2	2	0	0	0	2	2	2	1	0	0	1	0	0	0	0	0	0	0	0
BF0604038	Boulare	S	2	2	2	0	0	0	2	2	2	2	0	0	2	2	0	0	1	1	0	0	0
BF0603651	Guere	S	2	2	2	0	0	0	2	2	2	2	2	2	2	0	0	0	0	0	0	0	0
BF0603596	Goubla	S	2	2	2	0	0	0	2	2	2	1	0	0	1	0	0	0	0	0	0	0	0
BF0603724	Boura-Toemissin	S	2	2	2	0	0	0	2	2	2	1	0	0	1	0	0	0	0	0	0	0	0
BF0603610	Tamse	S	2	2	2	0	0	0	2	2	2	1	0	0	1	0	0	0	0	0	0	0	0
BF0601475	Koassa	S	2	2	2	0	0	0	2	2	2	1	0	0	1	1	1	1	1	1	0	0	0
BF0601664	Godin	S	2	2	2	0	0	0	2	2	2	1	0	0	1	1	1	1	1	1	0	0	0
BF0601759	Loussa	S	2	2	2	0	0	0	2	2	2	1	0	0	1	1	1	1	1	1	0	0	0
BF0601453	Koassa	S	2	2	2	0	0	0	2	2	2	1	1	1	1	0	0	1	1	1	0	0	0
BF0601466	Koassa	S	2	2	2	0	0	0	2	2	2	1	0	0	1	0	1	0	0	0	0	0	0
BF0602372	Bakaogo	S	2	2	2	0	0	0	2	2	2	1	0	0	1	1	1	0	0	0	0	0	0
BF0602770	Ragamsin	S	2	2	2	0	0	0	2	2	2	1	1	1	1	1	1	1	1	1	0	0	0
BF0602894	KaioboCentre	S	2	2	2	0	0	0	2	2	2	2	2	2	2	0	1	0	0	0	0	0	0
BF0602920	Teyoko	S	2	2	2	0	0	0	2	2	2	1	1	0	1	1	1	1	1	0	0	0	0
BF0601170	Kierma	S	2	2	2	0	0	0	2	2	2	1	0	0	1	1	1	1	1	1	0	0	0
BF0600980	Lamzondo	S	2	2	2	0	0	0	2	2	2	2	0	0	2	0	0	0	0	0	0	0	0
BF0601310	Kasondo	S	2	2	2	0	0	0	2	2	2	1	0	0	1	1	1	1	1	1	0	0	0
BF0600045	Kagamzince	S	2	2	2	0	0	0	2	2	2	1	0	0	1	1	1	1	1	1	0	0	0
BF0600412	Masgo	S	2	2	2	0	0	0	2	2	2	1	1	1	1	1	1	0	0	0	0	0	0
BF0603424	ToeBanega	S	2	2	2	0	0	0	2	2	2	1	0	0	1	0	0	0	0	0	0	0	0
BF0603368	Souli	S	2	2	2	0	0	0	2	2	2	1	0	0	1	1	1	1	1	1	0	0	0
BF0602938	Teyoko	S	2	2	2	0	0	0	2	2	2	1	0	1	1	1	1	1	1	1	0	0	0
BF0603144	Ragadogo	S	2	2	2	0	0	0	2	2	2	1	1	1	1	1	1	1	1	1	0	0	0
BF0603313	Bana	S	2	2	2	0	0	0	2	2	2	1	0	0	1	0	2	1	1	1	0	0	0
BF0603160	Guirgo	S	2	2	2	0	0	0	2	2	2	1	0	0	1	0	0	1	0	0	0	0	0
BF0603070	Garance	S	2	2	2	0	0	0	2	2	2	1	1	0	1	1	1	1	1	1	0	0	0
BF0602972	Larga	S	2	2	2	0	0	0	2	2	2	1	0	0	1	1	1	0	1	1	0	0	0
BF0603355	Souli	S	2	2	2	0	0	0	2	2	2	1	0	0	1	1	1	0	0	0	0	0	0
BF0603412	ToeBanega	S	2	2	2	0	0	0	2	2	2	1	1	0	1	1	1	0	0	0	0	0	0
BF0603088	Garance	S	2	2	2	0	0	0	2	2	2	1	0	0	1	0	0	0	0	0	0	0	0
BF0603178	Guirgo	S	2	2	2	0	0	0	2	2	2	1	0	1	1	1	1	0	1	1	0	0	0
BF0603325	Bana	S	2	2	2	0	0	0	2	2	2	1	0	0	1	1	0	0	0	0	0	0	0
BF0603470	Dissomey	S	2	2	2	0	0	0	2	2	2	1	0	0	1	0	0	0	0	0	0	0	0
BF0602982	Larga	S	2	2	2	0	0	0	2	2	2	1	0	0	1	0	0	0	0	0	0	0	0
BF0605425	Gounda	S	2	2	2	0	0	0	2	2	2	1	0	1	1	1	1	0	0	0	0	0	0
BF0605030	Toundou	S	2	2	2	0	0	0	2	2	2	1	0	0	1	1	1	0	0	0	0	0	0
BF0605099	Poessi	S	2	2	2	0	0	0	2	2	2	1	0	0	1	0	1	1	1	1	0	0	0
BF0605175	Ilyale	S	2	2	2	0	0	0	2	2	2	1	0	0	1	1	1	1	1	1	0	0	0
BF0602320	Sarogo	S	1	1	1	1	0	0	2	2	2	0	0	0	0	0	0	0	0	0	0	0	0
